1                   **Spike desensitisation as a mechanism for high-contrast selectivity**  
2                   **in retinal ganglion cells**

3                   (Abbreviated title: Spike desensitisation in retinal ganglion cells)  
4  
5

6 Le Chang<sup>1-3</sup>, Yanli Ran<sup>1,2,4</sup>, Olivia Auferkorte<sup>5</sup>, Elisabeth Butz<sup>5</sup>, Laura Hüser<sup>5</sup>, Silke Haverkamp<sup>5,6</sup>, Thomas  
7 Euler<sup>1,2\*</sup>, and Timm Schubert<sup>1,2\*</sup>

8  
9 <sup>1</sup>Institute for Ophthalmic Research, University of Tübingen, 72076 Tübingen, Germany

10 <sup>2</sup>Werner Reichardt Centre for Integrative Neuroscience (CIN), University of Tübingen, 72076  
11 Tübingen, Germany

12 <sup>3</sup>Institute of Neuroscience, Key Laboratory of Primate Neurobiology, CAS Center for Excellence in  
13 Brain Science and Intelligence Technology, Chinese Academy of Sciences, 200031 Shanghai, China

14 <sup>4</sup>Key Laboratory of Preclinical Study for New Drugs of Gansu Province, and Institute of Physiology,  
15 School of Basic Medical Sciences, Lanzhou University, 730000 Lanzhou, China

16 <sup>5</sup>Max-Planck-Institute for Brain Research, 60438 Frankfurt am Main, Germany

17 <sup>6</sup>Department of Computational Neuroethology, Max Planck Institute for Neurobiology of Behavior –  
18 caesar, 53175 Bonn, Germany

19  
20  
21  
22 \*Corresponding authors:

23 Thomas Euler (thomas.euler@cin.uni-tuebingen.de)

24 Timm Schubert (timm.schubert@cin.uni-tuebingen.de)

25  
26 Submitting author: Timm Schubert (timm.schubert@cin.uni-tuebingen.de)

27 Competing interests: The authors declare no competing financial interests.

28 Acknowledgements: This study was funded by Deutsche Forschungsgemeinschaft (DFG) (HA 5277/3-  
29 1, EU 42/4-1 and FOR 701). We thank Tom Baden, Philipp Berens, and Katrin Franke for helpful  
30 discussions and Gordon Eske for technical assistance.

## 31 ABSTRACT

32 In the vertebrate retina, several dozens of parallel channels relay information about the visual world  
33 to the brain. These channels are represented by the different types of retinal ganglion cells (RGCs),  
34 whose responses are rendered selective for distinct sets of visual features by various mechanisms.  
35 These mechanisms can be roughly grouped into synaptic interactions and cell-intrinsic mechanisms,  
36 with the latter including dendritic morphology as well as ion channel complement and distribution.  
37 Here, we investigate how strongly ion channel complement can shape RGC output by comparing two  
38 mouse RGC types, the well-described ON alpha cell and a little-studied ON cell that is EGFP-labelled in  
39 the *Igfbp5* mouse line and displays an unusual selectivity for high-contrast stimuli. Using patch-clamp  
40 recordings and computational modelling we show that in ON *Igfbp5* cells – but not in the ON alpha  
41 cells – a higher activation threshold and a pronounced slow inactivation of the voltage-gated Na<sup>+</sup>  
42 channels are responsible for the distinct contrast tuning and transient responses of ON *Igfbp5* RGCs,  
43 respectively. This study provides an example for the powerful role that the last stage of retinal  
44 processing can play in shaping RGC responses.

45

## 46 SIGNIFICANCE STATEMENT

47 Here, we investigated, how voltage-gated sodium channels contribute to shaping the light responses  
48 of mouse retinal ganglion cells. Using single-cell electrophysiology and computational modelling, we  
49 studied a ganglion cell type that displays highly transient responses and an unusual selectivity for visual  
50 high-contrast stimuli. We found that the cell's characteristic responses were largely determined by  
51 intrinsic mechanisms, notably, a high activation threshold and a pronounced slow inactivation of its  
52 voltage-gated sodium channels. Therefore, our study demonstrates how sodium channels at the last  
53 stage of retinal signal processing can contribute to shape retinal output to higher visual areas the brain;  
54 it also adds a rare example for how channel complement can be directly linked to feature selectivity.

55

## 56 INTRODUCTION

57 Retinal ganglion cells (RGCs) and their upstream circuits detect and encode specific visual features and  
58 relay this information along parallel pathways to higher visual centres in the brain (reviewed in  
59 (Kerschensteiner, 2022)). Functional, anatomical, and genetic evidence (Baden et al., 2016; Bae et al.,  
60 2018; Goetz et al., 2021; Rheume et al., 2018) support the presence of at least 40 RGC types in the  
61 mouse retina.

62 RGCs receive their excitatory drive mostly from bipolar cells (BCs), which relay the photoreceptor signal  
63 to the inner retina, and their inhibitory input from amacrine cells (ACs) (reviewed in (Diamond, 2017)).  
64 As the dendrites of different RGC types arborize at distinct IPL depths (Bae et al., 2018; Helmstaedter  
65 et al., 2013; Sümbül et al., 2014), they pick up inputs from distinct sets of BC and AC types (Field et al.,  
66 2010; Helmstaedter et al., 2013). The selective connectivity with presynaptic neurons in the inner  
67 plexiform layer (IPL) is considered the foundation of the feature-selectivity of RGC pathways (e.g.  
68 (Helmstaedter et al., 2013; Neumann et al., 2016; Roska and Werblin, 2001; Yu et al., 2018)).

69 The response properties of an RGC type are typically determined by a hierarchy of mechanisms. For  
70 instance, the temporal response of an RGC to a light-step is shaped by presynaptic circuit components,  
71 such as glutamate receptor kinetics along the BC-RGC pathway (Awatramani and Slaughter, 2000;  
72 DeVries, 2000; Turner and Rieke, 2016; Yu et al., 2018), as well as by AC input (Asari and Meister, 2012;  
73 Cui et al., 2016; Franke et al., 2017; Jacoby et al., 2015; Nikolaev et al., 2013; Nirenberg and Meister,  
74 1997). Moreover, the spatial RF is jointly formed by horizontal cells (Drinnenberg et al., 2018) and ACs  
75 (Diamond, 2017) in the outer and inner retina, respectively. In particular, AC circuits are very versatile  
76 “function modifiers”: For example, in the highly contrast-sensitive On alpha RGCs (Krieger et al., 2017),  
77 different AC circuits converge to provide On and Off inhibition to balance tonic excitatory drive from  
78 BCs (Park et al., 2018; Sawant et al., 2021); in On delayed RGCs, they provide a fast, excitatory surround  
79 through disinhibition (Mani and Schwartz, 2017).

80 In addition, RGC types differ in their expression of ion channels (Rheume et al., 2018; Siegert et al.,  
81 2012) and how they are distributed across the cell (reviewed in (Van Hook et al., 2019)). This ion  
82 channel complement, in combination with the RGC’s specific dendritic geometry, determines how  
83 synaptic input is integrated (Poleg-Polsky and Diamond, 2011; Ran et al., 2020; Schachter et al., 2010)  
84 and how the resulting signal is translated by the cell’s spike generator into action potentials on the  
85 optic nerve (Kim and Rieke, 2001, 2003; Mobbs et al., 1992; Raghuram et al., 2019; Werginz et al.,  
86 2020; Wienbar and Schwartz, 2022). Hence, RGCs “themselves” can importantly transform the input  
87 they receive from their circuits and thereby shape the retina’s output to the brain (reviewed in (Branco  
88 and Häusser, 2010; Stuart and Spruston, 2015; Tran-Van-Minh et al., 2015)).

89 The contribution of the aforementioned mechanisms to the RGC output varies among RGC types,  
90 yielding the diversity of feature representations, such as local edges (Levick, 1967; van Wyk et al., 2006;  
91 Zhang et al., 2012), approaching objects (Münch et al., 2009), “uniformity” (Jacoby et al., 2015; Levick,  
92 1967; Tien et al., 2016), and direction of motion (Barlow et al., 1964). For this, intrinsic properties may  
93 play a pivotal role: For instance, On-Off direction-selective (DS) RGCs employ a range of mechanisms,  
94 including directionally-tuned inhibitory and likely excitatory input from asymmetrically wired ACs, but

95 their dendritic morphology and active channel distribution substantially contribute to these cells' DS  
96 tuning (reviewed in (Borst and Euler, 2011; Mauss et al., 2017)).

97 Here, we study the role of a mechanism at the very end of the signal-shaping hierarchy, the encoding  
98 of the RGC membrane voltage into spike trains. We performed electrical single-cell recordings from a  
99 transient On RGC type that is EGFP-labelled in the transgenic *Igfbp5* mouse line (Siegert et al., 2009),  
100 which likely corresponds to G<sub>18a</sub> ("ON trans"; (Baden et al., 2016)), "ON transient small RF" (Goetz et  
101 al., 2021), and "6sn" (Bae et al., 2018). These cells display an unusual non-linear response behaviour  
102 in that they are sharply tuned to high-contrast light stimuli. Using single-cell current analysis and  
103 computational modelling, we show that desensitisation of the *Igfbp5*-positive transient On small (tOn-  
104 small) RGC's intrinsic spike generator accounts for both the transience of their light response and their  
105 selectivity for high contrasts.

## 106 RESULTS

### 107 *EGFP-expressing neurons in the Igfbp5 mouse retina*

108 Transgenic mice, in which specific RGC types are fluorescently labelled, greatly facilitate investigating  
109 RGC function (e.g. (Bleckert et al., 2014; Münch et al., 2009; Rousso et al., 2016; Yao et al., 2018)).  
110 While screening the Gene Expression Nervous System Atlas (GENSAT) database of transgenic mice for  
111 selective lines (Siegert et al., 2009), we were struck by the very distinctive pattern of retinal EGFP  
112 expression in the *Igfbp5* (insulin-like growth factor-binding protein 5) mouse line (Fig. 1A,B). In the  
113 *Igfbp5* retina, the EGFP is expressed in two prominent, equally thick bands of processes along IPL  
114 sublaminae 2 and 3 (Fig. 1A, Fig 1-1A-C), extending just in between the two choline acetyltransferase  
115 (ChAT) -positive bands (Fig. 1-1D,E). This pattern is reminiscent of the glypho (glycogen phosphorylase)  
116 staining in the macaque monkey retina (Majumdar et al., 2008). We detected EGFP in a subset of BCs  
117 and ACs in the inner nuclear layer (INL; Fig. 1A; for details, see Fig. 1-1A-E), as well as in some RGCs  
118 and displaced ACs in the ganglion cell layer (GCL; Fig. 1B; Fig. 1-1F).

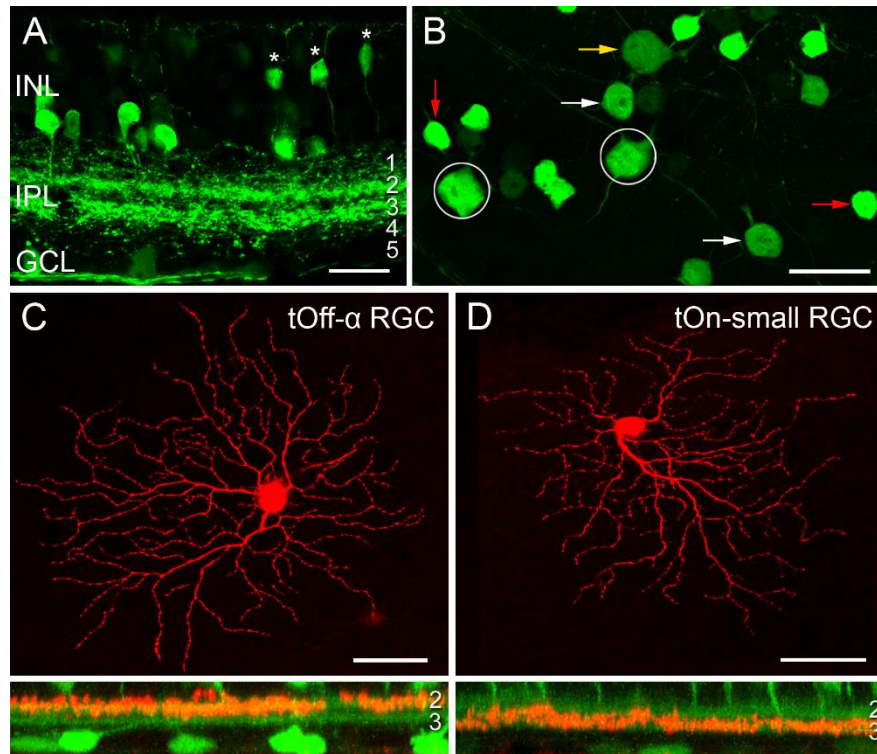

119

120 **Figure 1 | EGFP-labelled cells in the *Igfbp5* transgenic mouse line.** **A**, EGFP expression in a vertical section of the  
121 *Igfbp5* retina, with EGFP expressed in bipolar cells (BCs, asterisks) and amacrine cells (ACs) in the inner nuclear  
122 layer (INL), as well as in displaced amacrine cells and retinal ganglion cells (RGCs) in the ganglion cell layer (GCL).  
123 EGFP-labelled processes extend along sublaminae 2 and 3 of the inner plexiform layer (IPL). **B**, Whole-mount  
124 showing mosaic of EGFP-expressing somata in the GCL. Examples of putative displaced ACs (red arrows), Off RGCs  
125 with medium-sized (white arrows) and large (yellow arrow) somata, and On RGCs (circles) indicated. **C,D**,  
126 Examples of EGFP-positive RGCs: tOff- $\alpha$  RGC (C), and tOn-small RGC (D) filled with Neurobiotin during electrical  
127 recording. Below each panel, z-projections of the cell's dendritic arborisation. Scale bars: A, 20  $\mu$ m; B, 25  $\mu$ m;  
128 C and D, 50  $\mu$ m.

129 In the GCL, four cell types could be distinguished based on their soma size and labelling intensity (Fig.  
130 1B): very bright cells with small somata (soma diameter:  $9.1 \pm 0.5 \mu$ m, mean  $\pm$  s.d.,  $n = 29$ ), dimmer  
131 cells with medium-sized ( $12.0 \pm 0.5 \mu$ m,  $n = 24$ ) or larger somata ( $14.8 \pm 0.9 \mu$ m,  $n = 34$ ), and very dim  
132 cells with large somata ( $17.5 \pm 0.7 \mu$ m,  $n = 14$ ).

133 Dye-injections ( $n = 40$ ) revealed that the small, brightly labelled cells were likely displaced wide-field  
134 ACs (Lin and Masland, 2006): They featured 6-10 primary dendrites that sometimes bifurcated close  
135 to the soma ( $\sim 14$  dendrites/cell in total), rarely crossed each other and narrowly stratified in IPL  
136 sublamina 3 (Fig. 1-1F). The dendritic fields of neighbouring cells overlapped frequently, resulting in  
137 dense retinal coverage (Fig. 1-2). These putative ACs closely resembled glypho-positive On ACs in the  
138 macaque (Majumdar et al., 2008).

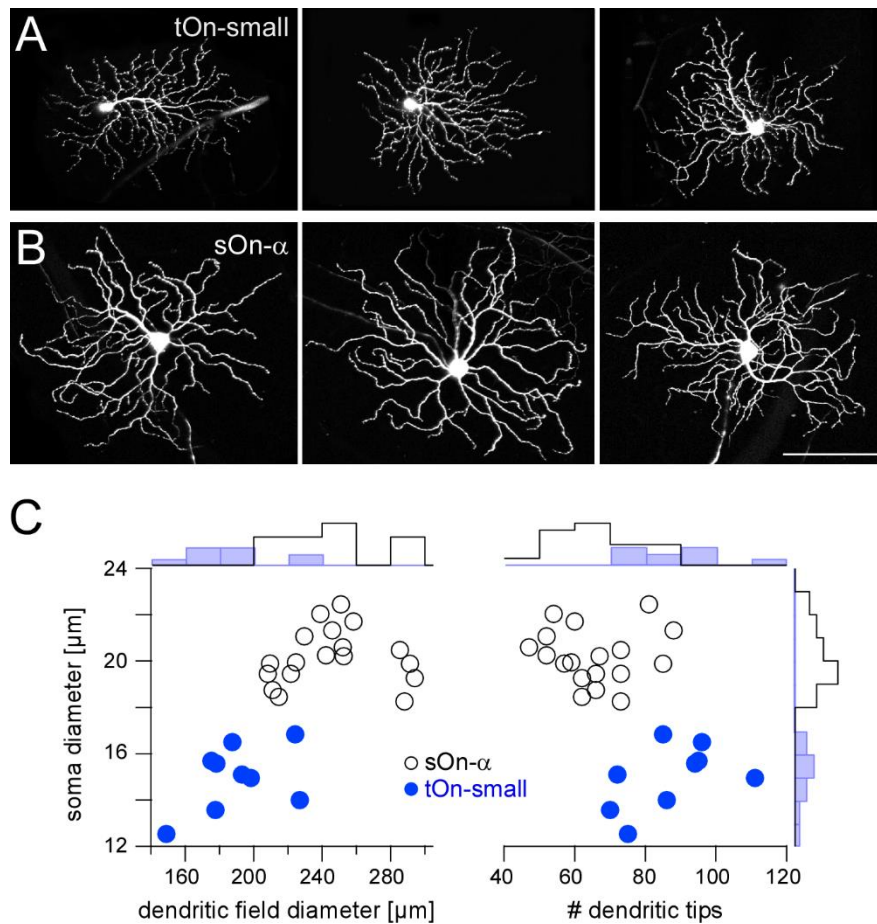

139

140 **Figure 2 | *Igfbp5*-positive *tOn-small* ganglion cells differ morphologically from sustained *sOn-α* cells. A,B,**  
 141 **Examples of dye-injected RGCs: three *tOn-small* (A) and three *sOn-α* cells (B). To avoid confounds related to**  
 142 **morphological variability across the retina (Bleckert et al., 2014), the cells were collected (and recorded) from the**  
 143 **ventral retina (~0.8 mm from the optic disc). C, Soma diameter vs. dendritic field diameter (left) and vs. number**  
 144 **of dendritic tips (right) for the two RGC types, with distribution histograms at the sides. Scale bar: A,B, 100 μm.**

145 The three other *Igfbp5*-positive cells in the GCL were monostratified RGCs (Fig. 1C,D; Fig. 2-1A-C) with  
 146 their dendrites in either one of the two EGFP bands (*cf.* Table 1). The cells with the largest, dimmest  
 147 somata were transient Off-alpha (*tOff-α*) RGCs (Fig. 1B,C; Fig. 2-1B) (Krieger et al., 2017; Ran et al.,  
 148 2020; van Wyk et al., 2009), as confirmed by immunolabeling (Fig. 2-1E-H) for markers such as SMI32  
 149 (Fig. 2-1E,F), which strongly labels sustained On alpha (*sOn-α*) and *tOff-α* cells in mouse (Bleckert et  
 150 al., 2014; Coombs et al., 2006). The remaining two labelled cell populations had dendritic arbour  
 151 diameters of around 200 μm.

152 The *Igfbp5*-positive cells with medium-sized somata were presumably Off cells, as their dendrites  
 153 stratified in sublamina 2; their morphology (Fig. 2-1A) resembled that of “4i” or “4on” cells described  
 154 in (Bae et al., 2018), cluster 3 (Kong et al., 2005), PV4 (Farrow et al., 2013), CB2 (Sümbül et al., 2014),  
 155 and RGB1 or “outer” RGB3 cells (Sun et al., 2002).

156 The mouse *Igfbp5*-positive RGCs with the larger somata (Fig. 1D and 2A,C; Fig. 2-1C) were presumably  
 157 On cells as they stratified in sublamina 3; their morphology resembled that of “6sn” (Bae et al., 2018),  
 158 “ON transient small RF” (Goetz et al., 2021), cluster 2 (Kong et al., 2005), PV2 (Farrow et al., 2013),  
 159 „cluster X” (Sümbül et al., 2014), and “inner” RGB3 cells (Sun et al., 2002). For simplicity, we refer to  
 160 the *Igfbp5*-positive On RGCs in the following as transient On small (tOn-small) cells.

| RGC type in <i>Igfbp5</i> line                               | IPL depth | RGC types in recent studies |                     |                       |                       |                    |                       |                            |
|--------------------------------------------------------------|-----------|-----------------------------|---------------------|-----------------------|-----------------------|--------------------|-----------------------|----------------------------|
|                                                              |           | (Bae et al., 2018)          | (Kong et al., 2005) | (Farrow et al., 2013) | (Sümbül et al., 2014) | (Sun et al., 2002) | (Goetz et al., 2021)  | (Baden et al., 2016)       |
| <b>Off</b><br>(medium soma, bright)                          | S2        | 4i or 4on                   | cluster 3           | PV4                   | CB2                   | RGB1 or outer RGB3 | OFF tr SmRF           |                            |
| <b>On</b><br>(large soma, bright)                            | S3        | 6sn                         | cluster 2           | PV2                   | cluster X             | inner RGB3         | ON transient small RF | G <sub>18a</sub> ON trans. |
| <b>trans. Off <math>\alpha</math></b><br>(largest soma, dim) | S2        | 4ow                         |                     | PV5                   | W7a                   | A2 outer           | OFF tr alpha          |                            |

161 **Table 1 | *Igfbp5*-positive RGCs and their presumed morphological counterparts in earlier mouse studies.**  
 162 *Missing entries indicate that type assignment is unclear.*

163 Mouse transient On-alpha (tOn- $\alpha$ ) RGCs stratify at the same level as the tOn-small cells, but have a  
 164 slightly larger dendritic tree (Goetz et al., 2021) and are osteopontin-positive (Krieger et al., 2017). We  
 165 think that the tON-small RGCs are homologous to primate parasol cells (Fig. 2-1I) – as was suggested  
 166 for cluster 12 cells of Farrow and Masland (2011) .

### 167 *tOn-small RGC responses are highly transient*

168 When we characterized light-evoked signals in tOn-small cells using two-photon-guided electrical  
 169 recordings (Methods), we were intrigued by their very transient responses – with the spike rate  
 170 increasing almost instantaneously at light-onset but then quickly dropping to zero within ~200 ms and  
 171 no response at light-offset (Fig. 3-1A). As such transient responses were described in a type of  
 172 direction-selective On RGC in rabbit (Kanjhan and Sivyer, 2010), we recorded tOn-small cell responses  
 173 to a moving bar stimulus, but did not find any substantial directional tuning in these cells (Fig. 3-1B;  
 174  $DS_i = 0.043 \pm 0.019$ ,  $n=5$  cells).

175 In the following, we studied the mechanisms underlying the characteristic transient responses of tOn-  
 176 small cells in the mouse retina. For comparison, we recorded the well-described sOn- $\alpha$  RGCs (Peichl et  
 177 al., 1987), which are known for their sustained responses and high contrast sensitivity (Bleckert et al.,  
 178 2014; Krieger et al., 2017; Pang et al., 2003; Schwartz et al., 2012; van Wyk et al., 2009) (Fig. 2B).

179 Morphologically, the two RGC types could be distinguished easily, with tOn-small cells having smaller  
180 somata and dendritic fields, but more dendritic tips than sOn- $\alpha$  cells (Fig. 2).

181 *tOn-small cells encode high-contrast signals*

182 First, we studied the spatial receptive field (RF) organisation of tOn-small cells using spot stimuli with  
183 varying diameters centred on the soma and sinusoidally modulated at 1 Hz (Fig. 3A,B), in comparison  
184 to sOn- $\alpha$  cells. Using spectral analysis, we then calculated the amplitude of the cells' fundamental  
185 response component (Methods). With increasing spot diameter, amplitudes first increased and then  
186 declined (Fig. 3B), indicative of centre-surround antagonism. To quantify the spatial RFs, we used a  
187 Difference-of-Gaussians (DOG) model to interpret the recorded area summation data (Methods).  
188 Consistent with their larger dendritic field diameters (Fig. 2), sOn- $\alpha$  cells had larger RF centres than  
189 tOn-small cells (Fig. 2C).

190



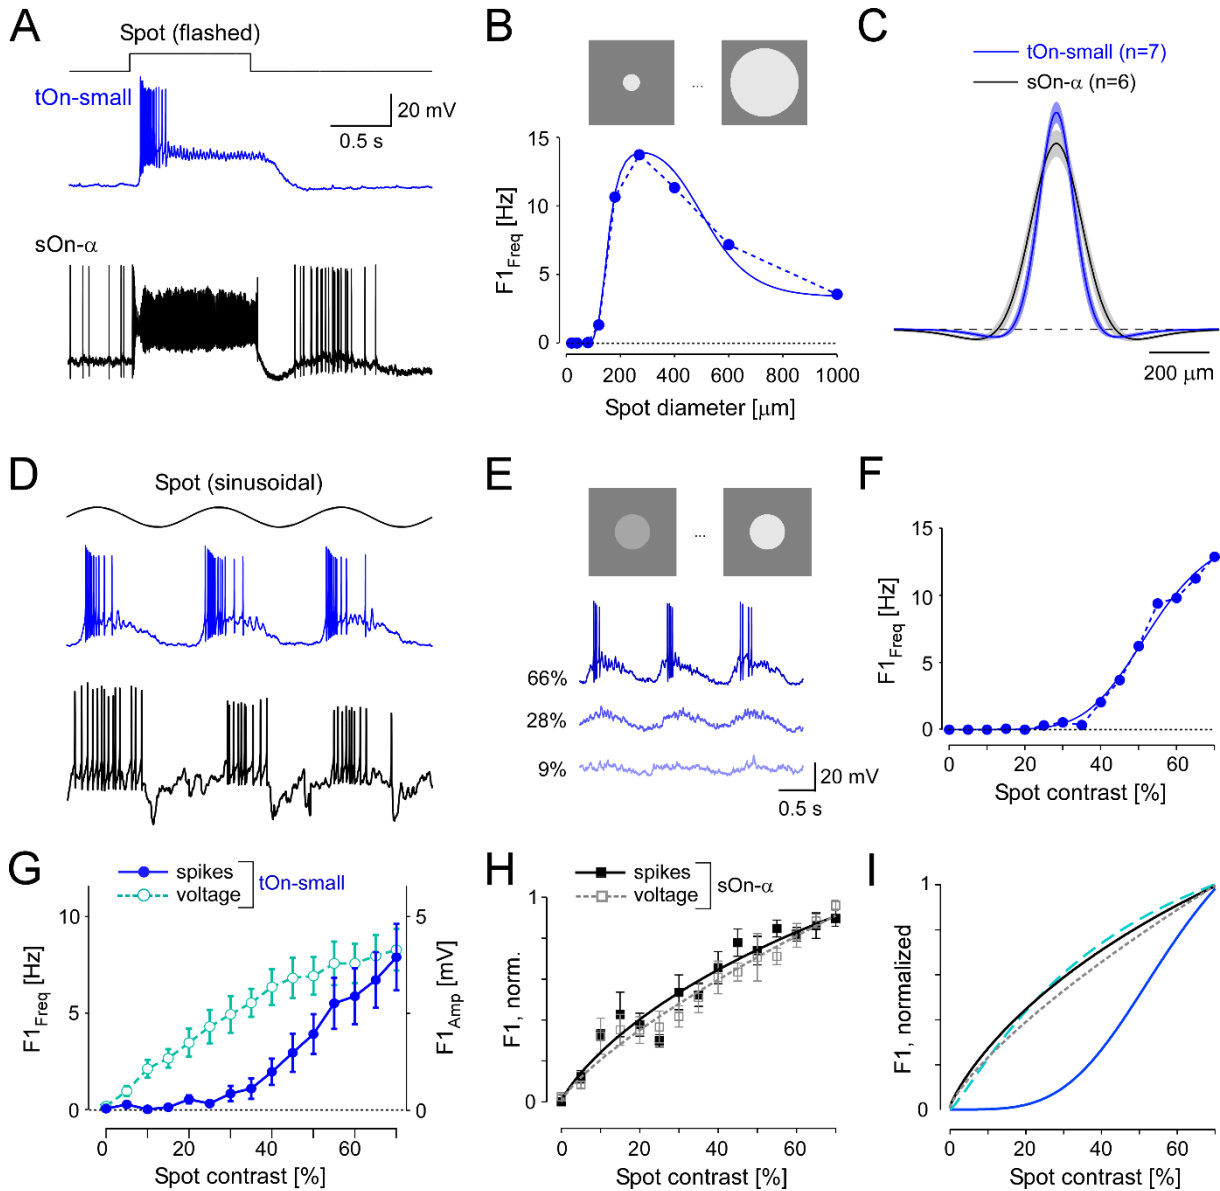

191

192 **Figure 3 | tOn-small ganglion cells have smaller receptive fields (RFs) and higher contrast thresholds compared**  
 193 **to sOn- $\alpha$  cells** **A**, Intracellularly recorded voltage responses of an tOn-small (blue) and a sOn- $\alpha$  (black) to a 1-s  
 194 flashed spot (200  $\mu\text{m}$  in diameter). **B**, Fundamental (F1) spiking response ( $F1_{\text{Freq}}$  in Hz) as a function of spot  
 195 diameter (1 Hz, 57% mean contrast) for the same tOn-small cell as in (A). **C**, Mean and SEM of estimated RF  
 196 profiles, using difference-of-Gaussians (DOG) RF model for  $n=7$  tOn-small and  $n=6$  sOn- $\alpha$  cells (Methods). **D**,  
 197 Responses of the same cells as in (A) to a 1-Hz sinusoidal stimulus (270  $\mu\text{m}$  in diameter). **E**, Exemplary responses  
 198 of an tOn-small cell for different contrasts. **F**,  $F1_{\text{Freq}}$  as a function of stimulus contrast ( $D_1$ ; 270  $\mu\text{m}$  diameter spot;  
 199 data fit with Naka-Rushton equation; Methods) for the same tOn-small cell as in (E). **G**, Response-contrast  
 200 functions for tOn-small cells (blue, spikes,  $n=7$  cells; cyan, voltage,  $n=3$  cells). **H**, Normalized response-contrast  
 201 curves for an additional set of sOn- $\alpha$  cells (black, spikes,  $n=6$  cells; grey, voltage,  $n=6$  cells; Naka-Rushton fits). **I**,  
 202 Normalized response-contrast curves (dataset from (G,H); Naka-Rushton fits). Symbols and error bars represent  
 203 mean and SEM, respectively.

204 In the DOG model, we included a static-nonlinearity to convert the weighted stimulus into a firing rate.  
 205 Because the area summation data by itself was not sufficient to characterize this nonlinearity, we also  
 206 presented spots with fixed diameter but with different contrasts (Fig. 3D). Here, we used the spot

207 diameter (270  $\mu\text{m}$ ) that elicited the maximal spiking response. Other than sOn- $\alpha$  cells, tOn-small cells  
208 were insensitive to weak stimuli: Sinusoidally modulated spots with contrasts lower than 40% hardly  
209 evoked any spiking response (Fig. 3E,F).

210 We also analysed the graded voltage responses recorded in the whole-cell current-clamp mode (with  
211 spikes digitally removed, *Methods*) and found that the strong threshold-like behaviour was not  
212 reflected in the graded response: tOn-small cells showed a detectable depolarization even to the  
213 smallest contrast tested (5%, Fig. 3G, cyan circles vs. blue circles), resulting in a contrast sensitivity  
214 curve similar to that for the sOn- $\alpha$  cells' spiking response (Fig. 3H; black squares). Note that sOn- $\alpha$  cells  
215 displayed a very similar contrast sensitivity curve for spikes and graded voltage (Fig. 3H; filled black vs.  
216 open grey squares). Together, this suggests that the conversion of voltage into a spiking response  
217 differs between tOn-small and sOn- $\alpha$  cells (Fig. 3I). A possible explanation may be a larger difference  
218 between resting potential and spiking threshold in tOn-small vs. sOn- $\alpha$  cells. While the resting  
219 potential ( $V_{\text{rest}}$ ) of tOn-small cells ( $-66.8 \pm 3.4$  mV;  $n=6$ ) indeed was slightly more hyperpolarized than  
220 that of sOn- $\alpha$  cells ( $-64.8 \pm 3.3$  mV;  $n=6$ ), the difference seems too small to explain the observed  
221 difference in contrast sensitivity alone.

222 The mismatch in contrast sensitivity between spiking and graded voltage responses in tOn-small cells  
223 is striking. Related to this was our finding that when stimulated with a bright flash, the cells displayed  
224 a sustained graded voltage response – in contrast to the transient nature of their spiking response (Fig.  
225 3A, top). We therefore studied temporal processing in tOn-small (and, for comparison, sOn- $\alpha$ ) cells  
226 with a homogeneous white-noise stimulus (*Methods*), using again the optimal spot diameter. First, we  
227 calculated the spike triggered average (STA) as an estimate of the cell's temporal linear filter  
228 (Chichilnisky, 2001). tOn-small cells had highly biphasic filters, with an On-lobe close to the time of  
229 spike and an almost similarly strong Off-lobe further away (Fig. 4A<sub>1</sub>; blue curve). We quantified the  
230 filter's biphasic nature by calculating the ratio between Off- and On-lobe peak (Chander and  
231 Chichilnisky, 2001), yielding a biphasicity index ( $B_i$ ) of  $0.60 \pm 0.19$  ( $n=6$ ) for the spike response of tOn-  
232 small cells. In contrast, the linear filter estimated from their graded voltage response ( $B_i = 0.28 \pm 0.17$ ,  
233  $n=2$ ) and the STA-derived linear filters of sOn- $\alpha$  cells ( $B_i = 0.15 \pm 0.09$ ,  $n=5$ ) were more monophasic  
234 (Fig. 4A<sub>1</sub>; dashed cyan and black curve, respectively).

235 The difference between linear filters estimated from spike vs. voltage responses indicates that the  
236 nonlinearity underlying spike generation in tOn-small cells is not a "trivial" static nonlinearity, i.e. a  
237 simple nonlinear function whose output only depends on the present value of input. Because the linear  
238 filter estimation is expected to be resistant to a static nonlinearity (Chichilnisky, 2001), the involvement  
239 of a static nonlinearity should result in similar filters – independent of the response modality used  
240 (spikes vs. graded voltage). To characterize the nonlinearity in tOn-small cells, we calculated the

241 relationship between the linear response (“generator signal” = the convolution of estimated linear  
242 filter and stimulus) and the recorded response to the white noise stimuli. The resulting nonlinear  
243 function for the spike responses of tOn-small cells had a much higher threshold than that for their  
244 voltage responses and the spike responses of sOn- $\alpha$  cells (Fig. 4A<sub>2</sub>).

245 Many response features of RGCs, including temporal properties and contrasts sensitivity, can be  
246 shaped by synaptic interactions (Introduction). However, the clear differences in transiency and  
247 contrast sensitivity between spiking and graded voltage responses observed in tOn-small (but not sOn-  
248  $\alpha$ ) RGCs point at the intrinsic spike generator of tOn-small cells. Therefore, in the following we focused  
249 on this final step in retinal signal transformation.

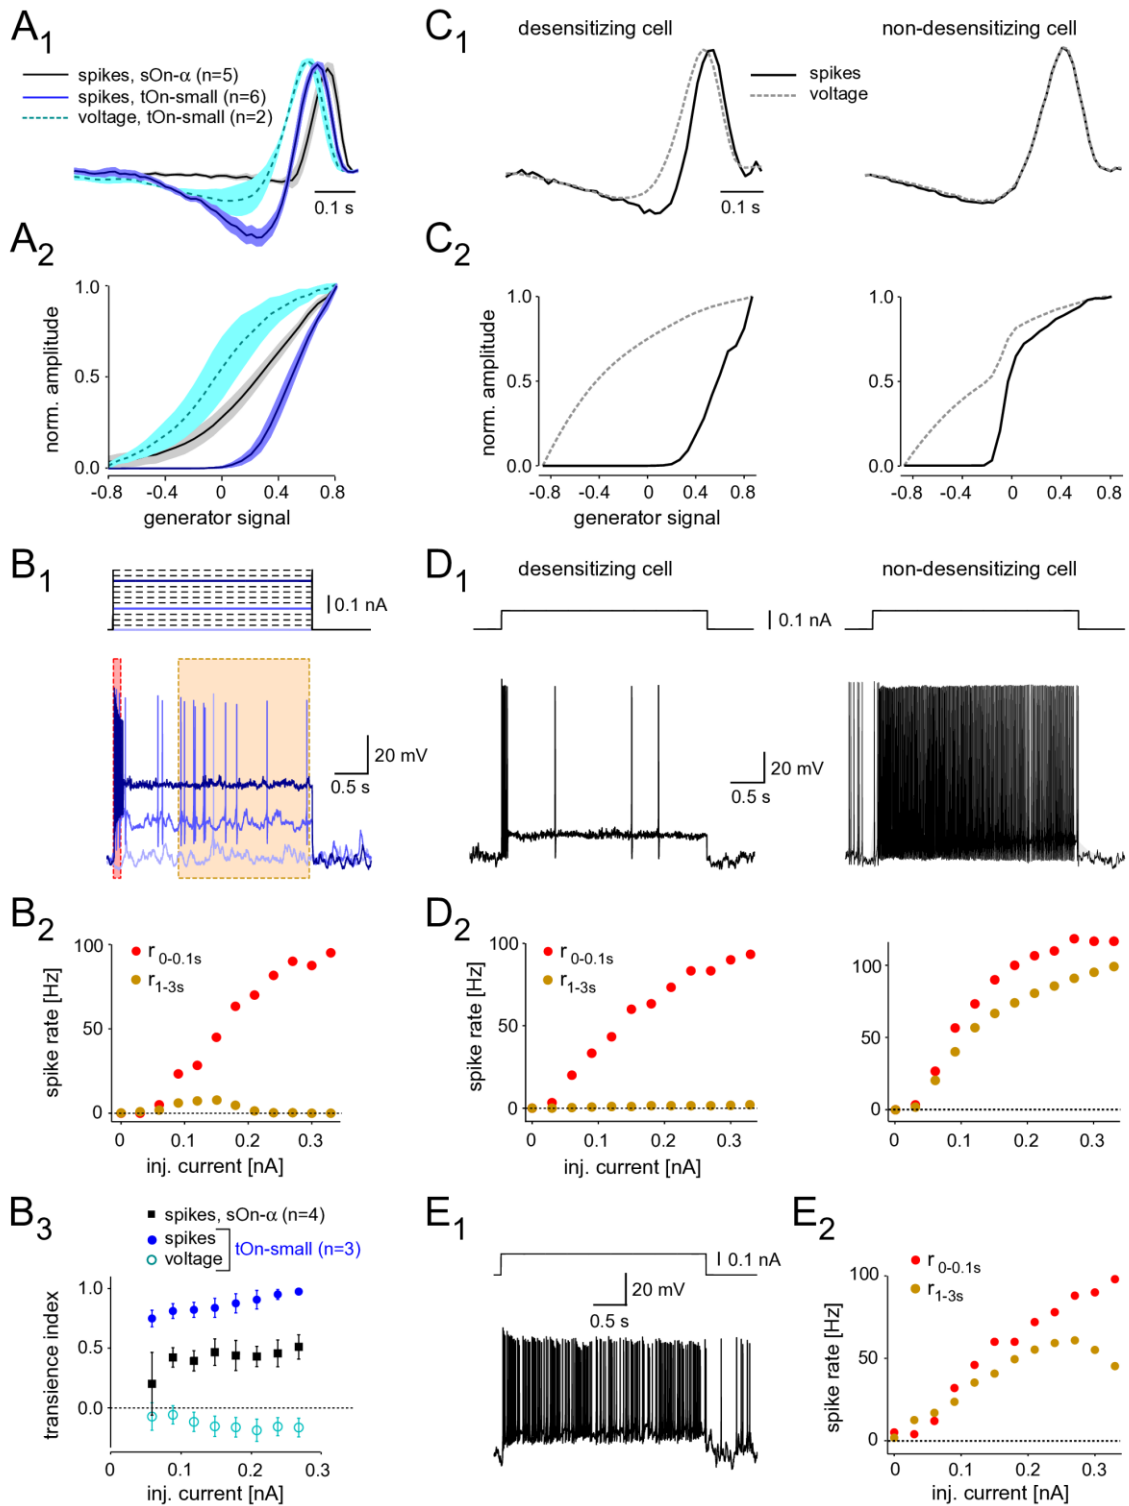

250

251 **Figure 4 | Spike desensitisation in tOn-small ganglion cells accounts for their biphasic temporal filter and high**  
 252 **contrast threshold.** **A**, Temporal linear filter (A<sub>1</sub>) and static nonlinearity (A<sub>2</sub>) estimated using a white noise  
 253 stimulus (Methods) for tOn-small (blue, spikes, n=6 cells; cyan, graded voltage responses, n=2 cells) and sOn- $\alpha$   
 254 cells (black, spikes, n=5 cells). **B**, Intracellularly recorded voltage responses of a tOn-small cell (B<sub>1</sub>, bottom, resting  
 255 potential  $V_{rest} = -66$  mV) in response to current injections of varying amplitude (B<sub>1</sub>, top), resting  
 256 cell right after current injection onset (0-0.1 s, red) and at steady-state (1-3 s, brown), as functions of injected  
 257 current (for time windows, see B<sub>1</sub>). B<sub>3</sub>, Relationship between spike desensitisation and injected current for tOn-  
 258 small (blue, spikes; cyan, graded voltage responses, n=3) and sOn- $\alpha$  cells (black, spikes, n=4). Spike desensitisation  
 259 was quantified as transience index ( $Ti_{spike} = 1 - (r_{1-3s}/r_{0-0.1s})$ ) or  $Ti_V = 1 - (V_{1-3s}/V_{0-0.1s})$ , with spike rate  $r$

260 and baseline-corrected graded potential  $V$ , respectively). Symbols and error bars represent mean and SEM,  
261 respectively. **C**, Temporal linear filter ( $C_1$ ) and static nonlinearity ( $C_2$ ) estimated using simulated responses of two  
262 modelled RGCs (left: with strong spike desensitisation; right: with weak spike desensitisation) to a white noise  
263 stimulus (for details, see text). **D**, Voltage responses of the two modelled cells to current injection of 0.1 nA ( $D_1$ )  
264 and their firing rates as functions of injected current ( $D_2$ , analogous to recording in  $B_2$ ). **E**, Voltage recording of a  
265 sOn- $\alpha$  cell ( $V_{rest} = -64$  mV) in response to current injections of 0.1 nA ( $E_1$ ) and its firing rate as a function of injected  
266 current ( $E_2$ , analogous to  $B_2$ ).

### 267 *Spike generation in tOn-small RGCs is readily desensitised by constant current injection*

268 The comparison between spike and graded voltage responses revealed two distinct features of spike  
269 generation in tOn-small cells: (i) the high-threshold nonlinearity and (ii) the pronounced biphasicity of  
270 the linear filter. The first feature may simply result if the spike threshold is substantially higher than  
271 the resting potential. The second feature implies more complicated nonlinearities, such as spike  
272 desensitisation (Goldin, 1999). We tested the spike generator by injecting constant current of different  
273 amplitudes into the cells while recording their voltage responses (Fig. 4B<sub>1</sub>). We found that for tOn-  
274 small cells, injection of a large current elicited a burst of spikes at injection onset but then spiking  
275 stopped rapidly (Fig. 4B<sub>1</sub>, dark blue trace). The initial spike frequency (time window: 0-0.1 s) scaled  
276 almost linearly with the amplitude of injected current (Fig. 4B<sub>2</sub>, red symbols), whereas the steady-state  
277 spike frequency remained as low as  $\sim 10$  spikes/s or less (orange symbols). As a result, transiency of the  
278 spike response increased with stimulus strength, as indicated by the increasing ratio between initial  
279 spiking response and steady state (Fig. 4B<sub>3</sub>). This increase was absent or less pronounced in graded  
280 voltage responses of tOn-small cells and spiking responses of sOn- $\alpha$  cells, respectively. Together, this  
281 points at strong desensitisation of the spike generator in tOn-small cells.

### 282 *Spike desensitisation model mimics response properties of tOn-small RGCs*

283 We constructed a simple model to explore how varying levels of spike desensitisation affect the signal  
284 encoding properties of desensitising and non-desensitizing cells, such as tOn-small and sOn- $\alpha$  cells,  
285 respectively (Methods). We modelled responses to the white-noise stimulus by calculating the  
286 amplitude of the input current to the cell using a simple linear-nonlinear (LN) model. First, for the  
287 desensitising case (Fig. 4C<sub>1,2</sub>; left), we estimated the linear filter and nonlinearity from graded voltage  
288 responses measured in tOn-small RGCs (Fig. 4A<sub>1,2</sub>). Using the voltage output of the modelled cell, we  
289 then estimated linear filter and nonlinearity for the spike responses. We found that the spike response-  
290 derived linear filter was more biphasic than that based on the graded voltage response, very similar to  
291 what we measured in tOn-small cells (cf. Fig. 4A<sub>1,2</sub>). For the non-desensitising case (Fig. 4C<sub>1,2</sub>; right),  
292 the two linear filters were nearly identical. In both model cells, the nonlinearity for spike responses  
293 exhibited a higher threshold than that for graded voltage responses, however, only the threshold in  
294 the desensitising cell was higher than the linear response to 0% contrast (generator signal = 0; Fig. 4C<sub>2</sub>;

295 cf. panel A<sub>2</sub>). Therefore, low-contrast stimuli (generator signal  $\sim 0$ ) evoke only sub-threshold responses  
296 in the desensitising model cell – very similar to the responses recorded in tOn-small cells (cf. Fig. 3E).

297 We also used current steps with different amplitudes as model input (Fig. 4D). As expected, the  
298 desensitising model cell displayed little or no spike response at the steady state (1-3 s) of the current  
299 step (Fig. 4D; left), very similar to the responses recorded in tOn-small RGCs (Fig. 4B<sub>1</sub>). In contrast, the  
300 steady-state response of the non-desensitising model cell was nearly as strong as its response at the  
301 current injection onset (0-0.1s;  $r_{2-3s}/r_{0-0.1s} > 70\%$ ) for each current amplitude (Fig. 4D, right), very  
302 similar to the recorded response of sOn- $\alpha$  cells (Fig. 4E).

303 In conclusion, our model supports that spike desensitisation and a high spiking threshold may account  
304 for two distinct response features of tOn-small RGCs: their strong transience and their selectivity for  
305 high contrasts. Note that our simple desensitising model generates responses very similar to those of  
306 tOn-small cells, whereas the match between the non-desensitising model and sOn- $\alpha$  cells is not as  
307 good: The nonlinearity is “steeper” in the non-desensitising model cell than that estimated from sOn-  
308  $\alpha$  cell recordings (Fig. 4C<sub>2</sub> right vs. 4A<sub>2</sub>). This discrepancy suggests that a sOn- $\alpha$  cell model requires  
309 additional properties, such as, for example, a higher noise level in the membrane potential, which can  
310 result in a smoother nonlinearity (Anderson et al., 2000).

### 311 *Voltage-gated Na<sup>+</sup> channels in tOn-small RGCs are high-threshold activated*

312 Our modelling predicts that the Na<sup>+</sup> channel desensitization observed in tOn-small cells may result  
313 from differences in voltage-gated Na<sup>+</sup> channel (VGSC) activation, inactivation and/or recovery from  
314 inactivation (Carter and Bean, 2011). To test this experimentally, we recorded Na<sup>+</sup> currents in these  
315 cells and, for comparison, in sOn- $\alpha$  cells (Figs. 5 and 6). To isolate VGSCs, we blocked voltage-gated K<sup>+</sup>  
316 channels with Cs<sup>+</sup> and TEA in the electrode solution and voltage-gated Ca<sup>2+</sup> channels with Cd<sup>2+</sup> in the  
317 extracellular solution (Methods). With voltage-step protocols to characterize VGSC activation (Fig. 5A<sub>1</sub>)  
318 and inactivation (Fig. 5A<sub>2</sub>) we found VGSCs in tOn-small cells to activate at higher potentials than those  
319 in sOn- $\alpha$  cells (Fig. 5A<sub>3</sub>; tOn-small,  $-51.1 \pm 3.9$  mV, n=6; sOn- $\alpha$ ,  $-67.5 \pm 3.2$  mV, n=7; at 5% activation  
320 estimated from sigmoidal fit), which explains why a substantial depolarisation (approx. >15 mV from  
321  $V_{Rest}$ ) is required to trigger spikes in tOn-small cells, consistent with their selectivity for high contrasts.  
322 However, the inactivation profiles were almost identical (Fig. 5A<sub>3</sub>), suggesting that at least for this  
323 protocol, the VGSCs in the two cell types share similar steady-state inactivation properties.

324 *Voltage-gated Na<sup>+</sup> channels in tOn-small RGCs need stronger hyperpolarization and longer*  
325 *times to recover from inactivation*

326 It is known that VGSCs can undergo inactivation at different timescales and that their recovering from  
327 different states of inactivation may differ in its time- and voltage-dependence (e.g. (Martiszus et al.,  
328 2021; Tsai et al., 2011)). Hence, we next wanted to look at these aspects in the two cell types. To this  
329 end, we probed the cells with two test pulses ( $P_1$ ,  $P_2$ ), with  $P_2$  following a 1 s “inactivating” voltage-step  
330 and a short 20 ms hyperpolarizing pre-pulse (Fig. 5B<sub>1</sub>). While the previous protocol (Fig. 5A<sub>2</sub>) tested  
331 the combined effects of fast and slow inactivation, the insertion of a pre-pulse enables VGSCs to  
332 recover from fast inactivation and, hence, probing the effect of slow inactivation (Kim and Rieke, 2003;  
333 Silva, 2014). In the presence of this pre-pulse, the inactivating step reduced the test pulse response in  
334 both RGC types, but much more so in tOn-small cells (Fig. 5B<sub>2</sub>). This indicates that the VGSCs’ slow  
335 inactivation differed between the two cell types with respect to voltage-dependence, with the VGSCs  
336 in tOn-small displaying consistently stronger inactivation for step voltages  $\geq -70$  mV.

337 To probe the time-dependence of recovery from inactivation, we first applied a pulse-train protocol  
338 with two different frequencies (Fig. 5C<sub>1,2</sub>), mimicking the activation by spikes (Kim and Rieke, 2003).  
339 We quantified VGSC inactivation by calculating the ratio between the Na<sup>+</sup> current activated by the  $i^{\text{th}}$   
340 pulse ( $I_{Na(i)}$ ) and that activated by the 1<sup>st</sup> pulse of a train ( $I_{Na(1)}$ ). We found that  $I_{Na}$  ratio  
341 ( $I_{Na(i)}/I_{Na(1)}$ ) in tOn-small cells dramatically dropped at 20 Hz already for the 2<sup>nd</sup> pulse to  $\sim 75\%$  and  
342 for the 10<sup>th</sup> pulse to less than 50%, whereas in sOn- $\alpha$  cells,  $I_{Na}$  ratio was only slightly reduced by  
343 consecutive pulses (Fig. 5C<sub>2</sub>). This indicates that VGSCs in tOn-small cells need substantially more time  
344 to recover from inactivation compared to those in sOn- $\alpha$  cells.

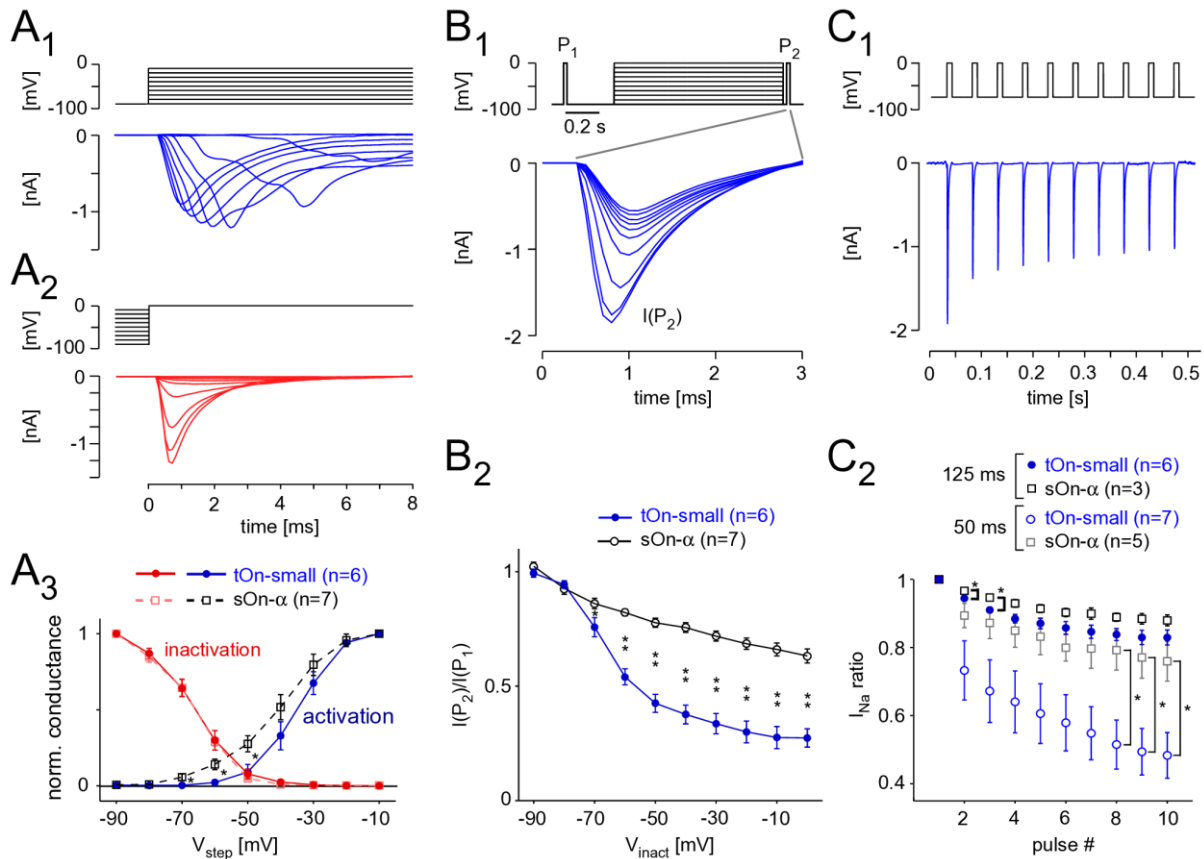

345

346 **Figure 5 | Voltage-gated Na<sup>+</sup> channels in tOn-small cells desensitize strongly.** **A**, Voltage-clamp recording of a  
 347 tOn-small cell to step protocols probing activation (A<sub>1</sub>) and inactivation (A<sub>2</sub>) of voltage-gated Na<sup>+</sup> channels  
 348 (VGSCs; A<sub>1</sub>, from -90 mV for 1 s to different voltages (-90 to -10 mV); A<sub>2</sub>, from different potentials (-90 to -10 mV)  
 349 for 1 s to 0 mV; ΔV=10 mV for both protocols). A<sub>3</sub>, Normalized conductance as functions of step voltage (V<sub>step</sub>) for  
 350 channel activation (squares) and inactivation (circles) in tOn-small (blue, n=6) and sOn-α cells (black, n=7). **B**,  
 351 Probing inactivation of VGSCs with 3-ms test pulses (to 0 mV) delivered before (P<sub>1</sub>) and after (P<sub>2</sub>) the 1-s  
 352 inactivating steps (B<sub>1</sub>, top; -90 to 0 mV, ΔV=10 mV, followed by an inactivating step for 20 ms to -90 mV). Na<sup>+</sup>  
 353 currents elicited by the 2<sup>nd</sup> test pulse (P<sub>2</sub>) in a tOn-small cell (B<sub>1</sub>, bottom). B<sub>2</sub>, Ratio of Na<sup>+</sup> current amplitudes  
 354 elicited by the two test pulses (cf. B<sub>1</sub>) plotted against inactivating voltage. **C**, Probing “inactivation sensitivity”  
 355 using sequences of 10-ms depolarizing voltage pulses (-70 to 0 mV). C<sub>1</sub>, Na<sup>2+</sup> currents elicited in a tOn-small cell  
 356 by a 20-Hz sequence. C<sub>2</sub>, Peak Na<sup>+</sup> currents as a function of pulse number for 20 (Δt=50 ms) and 8 Hz (Δt=125 ms  
 357 (blue circles and black squares for tOn-small and sOn-α cells, respectively). Peak Na<sup>+</sup> currents were normalized to  
 358 the amplitude evoked by the first pulse. Data from tOn-small (circles, n=7) and sOn-α cells (squares, n=5) for 20  
 359 Hz pulses, and tOn-small (circles, n=6) and sOn-α cells (squares, n=3) for 8 Hz pulses. Student’s t-test was used  
 360 for determining statistical significance (\*= p<0.05, \*\*= p<0.01) between different conditions in A<sub>3</sub>, B<sub>2</sub> and C<sub>2</sub>.

361 To study voltage- and time-dependence more closely, we went back to the two-pulse protocol. First,  
 362 we varied the duration of the hyperpolarizing pre-pulse (Δt<sub>pp</sub>) between inactivation step and second  
 363 test pulse to determine the time-dependence of recovery from slow inactivation (Fig. 6A,B). With  
 364 Δt<sub>pp</sub> = 0, inactivation was virtually the same for both cell types (cf. Fig. 5A<sub>2,3</sub>), but became significantly  
 365 different for Δt<sub>pp</sub> ≥ 20 ms before starting to approach similar values for Δt<sub>pp</sub> = 500 ms (Fig. 6B<sub>2</sub>),  
 366 which supports a difference in time-dependence of recovery from slow inactivation. Next, we kept the



367 duration of the pre-pulse constant but varied its voltage ( $V_{PP}$ ) to test the voltage-dependence (Fig.  
368 6C<sub>1</sub>). We found tOn-small cells recovered only to approx. half the levels compared to sOn- $\alpha$  cells for  
369 all tested  $V_{PP}$  values (Fig. 6C<sub>2</sub>), arguing for an additional difference in voltage-dependence of recovery.  
370 Finally, we changed the duration of the inactivating step ( $\Delta t_{inact}$  of 1, 2 or 4 s; Fig. 6D<sub>1</sub>) to make sure  
371 the difference between the cell types were not due to insufficient inactivation of the sOn- $\alpha$  cells; this  
372 seemed to have not been the case, as for all tested inactivation durations, tOn-small cells consistently  
373 showed stronger inactivation than sOn- $\alpha$  cells (Fig. 6D<sub>2-4</sub>).

374 Taken together, the differences observed in the spiking behaviour of tOn-small vs sOn- $\alpha$  cells likely  
375 arise from VGSCs in tOn-small cells (*i*) activate at a higher threshold, (*ii*) need stronger hyperpo-  
376 larization and (*iii*) more time to recover from steady-state slow inactivation. These results support that  
377 idea that properties of the spike generator (i.e. of the VGSCs) importantly contribute to the temporal  
378 coding properties observed in tOn-small RGCs.

379

380

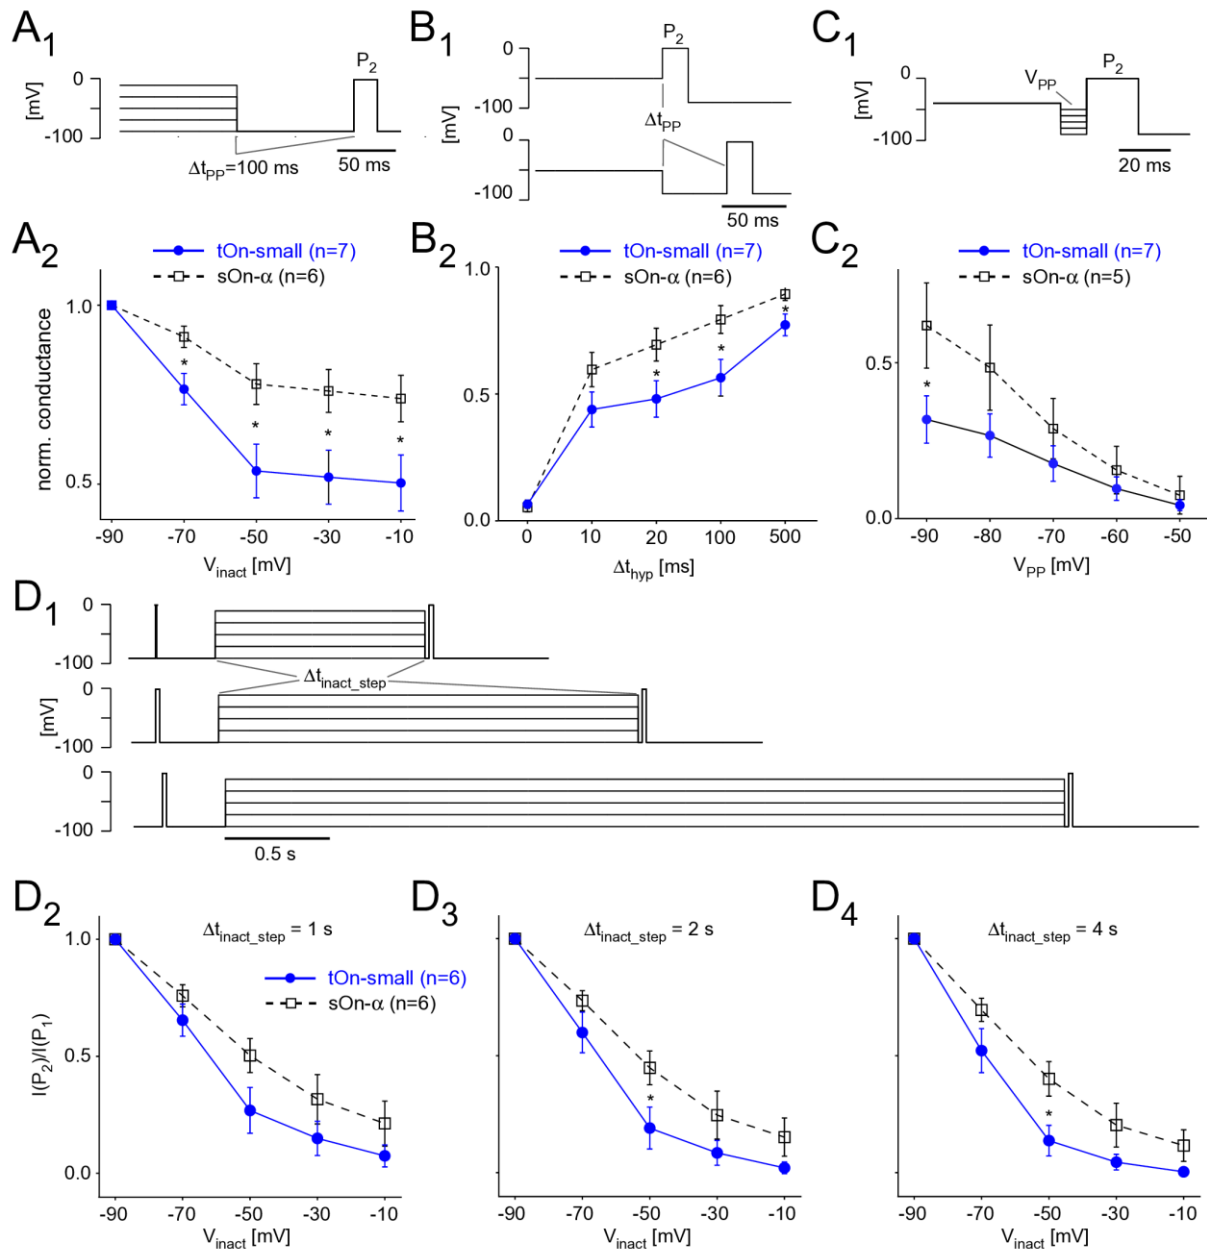

381

382 **Figure 6 | Steady-state slow inactivation of VGSCs shapes tOn-small RGC responses.** A, Same protocol as Fig.  
 383 5B, but with a 100-ms hyperpolarizing pre-pulse ( $V_{PP} = -90$  mV) inserted between inactivation step and test pulse  
 384 P<sub>2</sub>; P<sub>1</sub> not shown (A<sub>1</sub>). Normalized conductance as a function of inactivation step voltage for tOn-small (filled  
 385 circles) and sOn- $\alpha$  RGCs (open squares; A<sub>2</sub>). B, Like in (A) but with pre-pulse duration varied ( $\Delta t_{hyp} = 0, 10, 20, 100,$   
 386 and 500 ms) for a single inactivation step voltage ( $V_{inact} = -50$  mV). C, Like in (A) but with fixed  $\Delta t_{hyp} = 10$  ms and  
 387  $V_{inact} = -40$  mV, while varying pre-pulse voltage ( $V_{PP} = -90$  to  $-50$  mV). D, Same protocol as Fig. 5B but with the  
 388 duration of the inactivation step ( $\Delta t_{inact\_step}$ ) varied (D<sub>1</sub>). Test pulse current ratio ( $I(P_2)/I(P_1)$ ) as a function of  $V_{inact}$   
 389 for  $\Delta t_{hyp} = 1$  (D<sub>2</sub>), 2 (D<sub>3</sub>), and 4 s (D<sub>4</sub>). Student's t-test was used for determining statistical significance ( $* = p < 0.05$ )  
 390 between different conditions in A-D.

## 391 DISCUSSION

392 Here we studied the underlying cell-intrinsic mechanisms that encode membrane voltage into spike  
393 patterns in two distinct types of RGC in the mouse retina. Recordings of light- and current-elicited  
394 voltage responses showed differences in the relationship of membrane voltage and elicited spikes  
395 between tOn-small and On- $\alpha$  cells: Unlike in sOn- $\alpha$  RGCs, spiking but not the voltage signal in tOn-  
396 small RGCs was very transient and high-contrast selective. Modelling and voltage-clamp recordings  
397 revealed that this response pattern of tOn-small cells is largely shaped by stronger desensitisation of  
398 the cell's spike generator, i.e. its VGSCs. Our results support that notion that – in complement with  
399 upstream mechanisms and as the last step of the signal retinal processing chain – the intrinsic properties  
400 of an RGC can importantly shape the retina's output to the brain.

### 401 *Multiple mechanisms can shape RGC response kinetics*

402 RGC response properties can be shaped at different stage of retinal signal processing. First, RGCs can  
403 directly inherit diverse temporal response properties from their excitatory presynaptic partners, the  
404 BCs. It has been shown that transient BC types such as BC types 5t, 5o, 5i and XBC, mostly stratify in  
405 the central bulk of the IPL (Baden et al., 2013), therefore RGCs may become transient simply by having  
406 their dendrites tap into the respective IPL layers to collect transient excitatory input. Interestingly, the  
407 tOn-small cells likely correspond to the “6sn” cells classified in an EM dataset (Bae et al., 2018), which  
408 stratify slightly more towards the centre of the IPL than the sOn- $\alpha$  cells and thus can generate synapses  
409 with more transient BC types. This may contribute to more transient responses in tOn-small RGCs and  
410 more sustained responses in sOn- $\alpha$  cells. Second, inhibitory AC circuits can sharpen the time course of  
411 RGC responses either by shaping the signals at BC axon terminals or RGC dendrites (reviewed in  
412 (Diamond, 2017; Zhang and McCall, 2012)). Third, RGCs can employ intrinsic properties – i.e. kinetics  
413 of specific glutamate receptors and other postsynaptic channels, dendritic morphology and properties  
414 of the spike generator – to shape their spiking output. For example, in suppressed-by-contrast RGCs a  
415 depolarization block resulting from low VGSC conductance, short axonal initial segment (AIS) and  
416 selective expression of Na<sub>v</sub> isoforms (see below) underlies the cells' response (Wienbar and Schwartz,  
417 2022). In complement, our study suggests that the functional properties of VGSCs expressed in tOn-  
418 small cells are the key mechanism that shapes these cells' responses.

### 419 *Spike generator desensitisation and functional consequences*

420 Our results suggest that desensitisation of the spike generator, likely based on slow inactivation of the  
421 VGSCs themselves, shapes spike coding in tOn-small cells in two ways: their responses are more  
422 transient and their sensitivity for low contrast stimuli is decreased compared with sOn- $\alpha$  cells. In  
423 previous studies, it was shown that slow inactivation of VGSCs participates in the adaptation of RGCs

424 to temporal contrasts (Kim and Rieke, 2003; Weick and Demb, 2011). Another study investigating  
425 contrast adaptation in RGCs revealed two types of “plasticity” mechanisms: adaptation and  
426 sensitisation (Kastner and Baccus, 2011). Interestingly, the plasticity of the adapting type supports  
427 encoding of strong stimuli (i.e. high-contrast), whereas plasticity of the sensitising type promotes  
428 encoding of weak stimuli (i.e. low-contrast) – very similar to what we found in tOn-small (high contrast-  
429 selective) and sOn- $\alpha$  cells (also sensitive to low-contrast). Therefore, it is likely that desensitisation of  
430 the spike generator plays a functionally crucial role in at least three different aspects of RGC signalling:  
431 temporal kinetics (transient vs. sustained), contrast adaptation, and limiting the dynamic range for  
432 contrast encoding.

433 In our model, we simulated spike generator desensitization by changing the voltage dependence of  
434 the gating functions in a history-dependent manner (Methods). This can be thought as equivalent to  
435 slowing the recovery of the VGSCs from inactivation. Also, our voltage-clamp data points at the VGSCs  
436 to be involved in defining the response properties of tON-small cells: compared to sOn- $\alpha$  cells, the Na<sup>+</sup>  
437 currents in tOn-small cells exhibited a higher threshold and recovered more slowly from inactivation.  
438 Therefore, that tOn-small and sOn- $\alpha$  cells likely differ in their VGSC complement.

439 Using RT-PCR, four VGSC  $\alpha$ -subunit isoforms have been identified in rodent RGCs: Na<sub>v</sub>1.1, 1.2, 1.3 and  
440 1.6 (Fjell et al., 1997). Among other things, these isoforms differ in their persistent current (reviewed  
441 in (Goldin, 1999)): For example, for more positive membrane potentials, the persistent current of  
442 Na<sub>v</sub>1.6 increases, whereas that of Na<sub>v</sub>1.1 decreases. A persistent current that increases with  
443 depolarization “pulls” the membrane potential towards the spiking threshold and, thus, may favour  
444 sustained spiking. Indeed, a recent study provided evidence that Na<sub>v</sub>1.6 is dominantly expressed in  
445 mouse sustained OFF alpha RGCs, whereas suppressed-by-contrast RGCs likely express a different  
446 isoform (Wienbar and Schwartz, 2022). Thus, the expression ratio of VGSC isoforms affects the time  
447 course of an RGC’s spiking response. In addition, VGSCs are strongly modulated by accessory  $\beta$ -  
448 subunits (reviewed in (Goldin, 1999)), which can, for example, slow or accelerate inactivation, and shift  
449 voltage-dependence. Therefore, not only VGSC properties but also differential  $\beta$ -subunit expression  
450 may also contribute to the differences we observed between tOn-small and sOn- $\alpha$  cells.

451 Additionally, it was shown that a small subset of RGCs additionally expresses an unusual TTX-  
452 insensitive VGSC  $\alpha$ -subunit isoform in the soma and the proximal dendrites: Na<sub>v</sub>1.8 (O’Brien et al.,  
453 2008). These cells had large somata and were neurofilament-positive, suggesting that alpha (but not  
454 tOn-small) cells express Na<sub>v</sub>1.8. In contrast to the above VGSC isoforms, Na<sub>v</sub>1.8 mediates currents that  
455 exhibit very little subthreshold inactivation and recover much faster from inactivation (Cummins and  
456 Waxman, 1997; Renganathan et al., 2000). It is possible that channels with such properties contribute  
457 to the high contrast sensitivity – for instance, by enabling dendritic spiking (Velte and Masland, 1999)

458 – and the sustained spiking response of sOn- $\alpha$  cells. Nevertheless, we did not observe differences in  
459 inactivation between tOn-small and sOn- $\alpha$  cells which argues against a prominent role of Na<sub>v</sub>1.8 in  
460 sOn- $\alpha$  cells – at least under our experimental conditions.

461 Finally, VGSCs are precisely arranged in type-specific subdomains along the AIS (Van Wart et al., 2007).  
462 These VGSC “bands” appear to vary in length and location (relative to the soma) between RGC types  
463 (Fried et al., 2009; Wienbar and Schwartz, 2022). It was suggested that this organization shapes the  
464 response properties of the RGC spike generator, including the activation threshold (Fried et al., 2009).  
465 If the VGSC bands along the AIS of tOn-small and sON- $\alpha$  cells differ remains to be investigated.

#### 466 *Diverse retinal computations are performed by intrinsic properties of RGCs*

467 A great deal of neural computations taking place in the retina ultimately segregates features of the  
468 visual stimulus into diverse parallel channels to the brain (reviewed in (Baden et al., 2020; Gollisch and  
469 Meister, 2010; Kerschensteiner, 2022; Wässle, 2004)). Complex interactions involving different sets of  
470 interneurons in the two plexiform layers of the retina contribute to this parallel feature extraction  
471 (reviewed in (Diamond, 2017; Franke and Baden, 2017)). Our study highlights that a mechanism at the  
472 last step of retinal processing – intrinsic properties of the RGCs – can strongly participate in forming  
473 their responses. This is in line with several previous studies showing that spike generation in RGCs is  
474 rather diverse in its location and dynamics (see also above): For example, it was reported that Na<sup>+</sup>-  
475 based spikes can originate from both the dendrites and the soma region of RGCs (Oesch et al., 2005;  
476 Velte and Masland, 1999) and dendritic spikes play an important role in sharpening the directional  
477 tuning of DS RGCs (Oesch and Taylor, 2010; Schachter et al., 2010; Velte and Masland, 1999).  
478 Moreover, RGCs display very different levels of spike frequency adaptation in response to current  
479 injection (O’Brien et al., 2002). These studies, together with the present one, support the notion that  
480 RGCs are not the passive integrators of upstream signals – as they are still depicted in textbooks – but  
481 play an active role in retinal processing.

482 Still, the question arises what the advantage of feature extraction at the very last level of retinal  
483 processing may be. Considering the “feature” that is extracted by the tOn-small RGC – selective high-  
484 contrast signals – one may speculate that this RGC type exclusively relays very strong and reliable  
485 events to higher visual areas. Extracting this feature late in the retinal network may bear the advantage  
486 that signal-to-noise is at its maximum at the RGC level, providing a suitable high-quality signal to cut  
487 off low-contrast responses. Additionally, a feature extraction mechanism intrinsic to RGCs would be  
488 largely independent from the highly dynamic inner retinal circuits and could provide “stability” to the  
489 output signal. In light of evidence suggesting that the retinal code changes over the full range of  
490 illumination conditions (Tikidji-Hamburyan et al., 2014), a spike generator with properties like the one

491 in tOn-small RGCs may provide a “stable” element for encoding high-contrast signals across different  
492 visual environments.

## 493 MATERIALS AND METHODS

### 494 *Animals and tissue preparation*

495 The Tg(Igfbp5-EGFP)JE168Gsat transgenic mice were obtained from the Mutant Mouse Regional  
496 Resource Centre (MMRRC; University of California, Davis, CA, USA). In this transgenic mouse line, the  
497 EGFP reporter gene, followed by a polyadenylation sequence, was inserted into the BAC clone RP24-  
498 159O10 at the initiating ATG codon of the first coding exon of the Igfbp5 gene so that EGFP expression  
499 is driven by the regulatory sequences of the BAC gene (Gong et al., 2003). The resulting modified BAC  
500 (BX1812) was used to generate this transgenic mouse line (The Gene Expression Nervous System Atlas  
501 [GENSAT] Project, The Rockefeller University, New York, NY), to which we refer in the following as  
502 “*Igfbp5*” line.

503 All procedures were performed in accordance with the law on animal protection issued by the German  
504 Federal Government (Tierschutzgesetz) and approved by the institutional animal welfare committee  
505 of the University of Tübingen or the MPI for Brain Research, Frankfurt/M. Mice of both genders (4-8  
506 weeks of age) were housed under a standard 12 hr day/night rhythm. For electrical recordings, mice  
507 were dark-adapted for  $\geq 1$  h before the experiment. The animals were then anesthetized with  
508 isoflurane (Baxter) and killed by cervical dislocation.

509 For immunostainings, the mouse eyes were dissected in cold 0.1 M phosphate buffer (PB), pH 7.4 and  
510 the posterior eyecups were immersion fixed in 4% paraformaldehyde (PFA) in PB for 15–30 min at  
511 room temperature. Following fixation, retinas were dissected from the eyecup, cryo-protected in  
512 graded sucrose solutions (10, 20, 30% w/v), and stored at  $-20^{\circ}\text{C}$  in 30% sucrose until use. Retinal pieces  
513 were sectioned vertically at 16-20  $\mu\text{m}$  using a cryostat.

514 For electrical recordings, the mouse eyes were enucleated and hemisected in carboxygenated (95%  
515  $\text{O}_2$ , 5%  $\text{CO}_2$ ) artificial cerebral spinal fluid (ACSF) solution, which contained (in mM): 125 NaCl, 2.5 KCl,  
516 2  $\text{CaCl}_2$ , 1  $\text{MgCl}_2$ , 1.25  $\text{NaH}_2\text{PO}_4$ , 26  $\text{NaHCO}_3$ , 0.5 L-glutamine, and 20 glucose; maintained at pH 7.4.  
517 After removal of the vitreous body, each retina was flat-mounted onto an Anodisc (#13, 0.2  $\mu\text{m}$  pore  
518 size, GE Healthcare, Maidstone, UK) with the ganglion cell layer facing up. The Anodisc with the tissue  
519 was then transferred to the recording chamber of a two-photon (2P) microscope or a Zeiss Axioscope  
520 (see below), where it was continuously perfused with carboxygenated ACSF. When using the 2P  
521 microscope, ACSF contained 0.5–1  $\mu\text{M}$  Sulforhodamine 101 (SR101, Invitrogen Steinheim, Germany)  
522 to reveal blood vessels and any damaged cells in the red fluorescence channel (see below). All  
523 procedures were carried out under very dim red ( $>650$  nm) light.

## 524 *Antibodies and immunohistochemistry*

525 Cholinergic amacrine cells were labelled with goat anti-choline acetyltransferase (ChAT, 1:200;  
526 Chemicon), GABAergic amacrine cells with rabbit anti-GABA (1:2000; Sigma). A rat anti-glycine  
527 antibody labelled all glycinergic amacrine cells and ON cone bipolar cells (1:1000, kindly provided by  
528 David Pow, Brisbane, Australia). Rabbit anti-GFP was used to increase the EGFP signal (1:2000,  
529 Molecular Probes). The neurofilament marker SMI32 (mouse monoclonal, 1:1000; Sternberger  
530 Monoclonals) and a goat anti-osteopontin antibody (OPN, 1:1000; R&D Systems) were used to label  
531 alpha RGCs. Immunocytochemical labelling was performed using the indirect fluorescence method.  
532 Sections were incubated overnight with primary antibodies in 3% normal donkey serum (NDS), 0.5%  
533 Triton X-100, and 0.02% sodium azide in PB. After washing in PB, secondary antibodies were applied  
534 for 1 h. These were conjugated either to Cy3 (Dianova), or Alexa Fluor488 (Invitrogen).

535 Confocal images were taken by using a Zeiss LSM 5 Pascal confocal microscope equipped with an argon  
536 and a HeNe laser. Images were taken with a Plan-Neofluar 40x/1.3 objective. Figures represent  
537 projections calculated from stacks of images with the LSM software or ImageJ (W.S. Rasband,  
538 <http://imagej.nih.gov/ij/>). Brightness and contrast of the final images were adjusted using Adobe  
539 Photoshop.

## 540 *Single cell injection with Dil*

541 For dye injections of bipolar cells, enucleated eyes were transferred to oxygenated Ames medium  
542 (Sigma-Aldrich, Taufkirchen, Germany) and opened by an encircling cut. The retinas were dissected  
543 and embedded in 2% low melting agar (2-hydroxymethyl agarose, Sigma Aldrich), mounted on a  
544 vibratome (DSK Microslicer, DTK-1000, Ted Pella, Inc), and cut into 150  $\mu\text{m}$  sections. After another 10  
545 min in Ames Medium, sections were fixed in 4% PFA in PB at 4°C for 15 min. For injections with the  
546 fluorescent lipophilic tracer Dil (Molecular Probes) sharp microelectrodes were pulled from  
547 borosilicate glass tubing (Hilgenberg, Malsfeld, Germany) and filled with 0.5% Dil solution in 100%  
548 ethanol. The dye was injected into EGFP-labelled bipolar cells with 1nA positive current for 3 min. For  
549 Dil injections of amacrine cells and ganglion cells, retinal whole mounts were fixed in 4% PFA in PB for  
550 15-30 min. After fixation, the tissue was kept in PB at 4°C overnight for the efficient diffusion of dye  
551 into the fine dendrites and axons. The filled cells were documented by using the confocal microscope.

## 552 *Two photon microscopy*

553 We used a MOM-type two-photon microscope (designed by W. Denk, MPImF, Heidelberg; purchased  
554 from Science Products/Sutter Instruments, Novato, USA). Both design and procedures were described  
555 previously (Euler et al., 2009). The system was equipped with a mode-locked Ti:Sapphire laser (MaiTai-  
556 HP DeepSee, Newport Spectra-Physics, Germany) tuned to 927 nm, two detection channels for



557 fluorescence imaging (red, HQ 622 BP36; green, D 535 BP 50, or 520 BP 39; AHF, Tübingen, Germany)  
558 and a 20x objective (XLUMPlanFL, 0.95 NA, Olympus, Hamburg, Germany). The red fluorescence  
559 channel was used to visualize the retinal structure using SR101 staining (see above), the green channel  
560 to target EGFP-labelled *Igfbp5* RGCs.

### 561 *Electrophysiology*

562 In the *Igfbp5* line, two types of RGCs were targeted for intracellular recordings: Non-fluorescent sOn-  
563  $\alpha$  cells, identified by their very large polygonal somata, and EGFP-labelled tOn-small RGCs, which  
564 possess medium-sized somata ( $\sim 15 \mu\text{m}$  in diameter). The identity of the recorded RGC type was  
565 confirmed after the recording based on the dendritic morphology. To avoid confounds related to  
566 morphological variability across the retina (Bleckert et al., 2014), the cells were collected (and  
567 recorded) from the ventral retina ( $\sim 0.8$  mm from the optic disc).

568 For recording of light responses (current-clamp), electrodes (with resistances of 5–10 M $\Omega$ ) contained  
569 (in mM): 120 K-gluconate, 5 NaCl, 10 KCl, 1 MgCl<sub>2</sub>, 1 EGTA, 10 HEPES, 2 Mg-ATP, and 0.5 Tris-GTP,  
570 adjusted to pH 7.2 using 1M KOH. In addition, 4% Neurobiotin (Molecular Probes, Eugene, USA) and  
571 0.2 mM SR101 were added to reveal the cell's dendritic morphology. Membrane voltage was corrected  
572 for a liquid junction potential of  $\sim 14$  mV. Data were acquired using an Axoclamp-900A amplifier  
573 (Molecular Devices GmbH, San Jose, USA) and digitized at 10 kHz. Experiments were carried out at  
574 37°C. After the electrical recordings, the tissue was fixed and cells were visualized by overnight  
575 incubation in 1:1000 Streptavidin-Alexa Fluor 594 (Invitrogen, Darmstadt, Germany). The RGC's  
576 morphology (as image stack) was documented and Z-projection images were made using ImageJ.

577 For voltage-clamp recordings, CdCl<sub>2</sub> (100  $\mu\text{M}$ ) was added to the ACSF to block currents through voltage-  
578 gated Ca<sup>2+</sup> channels. Electrodes (with resistances of 5-8 M $\Omega$ ) contained (in mM): 120 Cs-gluconate, 1  
579 CaCl<sub>2</sub>, 1 MgCl<sub>2</sub>, 10 Na-HEPES, 11 EGTA, 10 TEA-Cl, Sulforhodamine B (0.005%), adjusted to pH 7.2 with  
580 CsOH. Liquid junction potentials of 15 mV were corrected before the measurement with the pipette  
581 offset function of the amplifier. Series resistance ranged from 5 to 21 M $\Omega$  ( $13.7 \pm 8.3$  M $\Omega$ , n=25) and  
582 cell capacitance were not compensated. Seal resistances  $> 2$  G $\Omega$  were routinely obtained. Cells were  
583 voltage-clamped at -90 mV and the different step protocols applied (see Figs. 5,6). All experiments  
584 were carried out at room temperature (20-22°C). Data were acquired using an Axopatch-200B  
585 amplifier (Molecular Devices, San Jose, USA), digitized at 10 kHz using the pClamp software (Molecular  
586 Devices), and Bessel-filtered at 2 kHz.

### 587 *Light stimulation*

588 For light stimulation, we used a small reflective liquid-crystal-on-Silicon (LCoS) display (i-glasses; EST),  
589 coupled in the microscope's optical path. The display was alternately illuminated by two bandpass-

590 filtered (blue, 400 BP 10; green, 578 BP 10; AHF) LEDs, projecting spatio-temporally structured stimuli  
591 through the objective lens onto the retina (Euler et al., 2009). Stimulus intensity was measured using  
592 a calibrated photometer (Model 842-PE, 200-1100 nm, Newport) set to the respective centre  
593 wavelength of the LED filters. Cone photo-isomerization rates were calculated as described previously  
594 (Chang et al., 2013); all stimuli featured equal photo-isomerization rates for M- and S-opsin. Five  
595 stimulus protocols were used:

- 596 (a) a 200  $\mu\text{m}$ -diameter bright spot flashed for 1 s,  
597 (b) a 300 x 1000  $\mu\text{m}$  bright bar moving at 500  $\mu\text{m}/\text{s}$  in 8 directions,  
598 (c) a 1 Hz sinusoidally-modulated bright spot of varying diameter at 57% mean contrast,  
599 (d) a 1 Hz sinusoidally-modulated spot of varying contrasts, with the optimal spot diameter  
600 determined by stimulus (c),  
601 (e) a flickering (white noise) spot, with the optimal spot diameter determined by stimulus (c); spot  
602 intensity was randomly chosen from a binary distribution for each frame (80 Hz refresh rate) and  
603 the mean intensity equal to background intensity.

604 For sinusoidally modulated stimuli (c, d), contrast was defined as the ratio of s.d. and mean intensity.  
605 The retina was always illuminated with a constant background in the (low) photopic range. In case of  
606 the protocols a and b, background illumination generated photo-isomerization rates (in  $10^4 \cdot \text{P} \cdot \text{s}^{-1}$  per  
607 photoreceptor) of 1.2, 0.9 and 2.2, and in case of protocols c to e, 2.3, 2.2 and 4.8 for M-opsin, S-opsin  
608 and rhodopsin, respectively.

## 609 *Data Analysis*

610 All electrophysiological data were analysed off-line using custom MATLAB scripts (Mathworks,  
611 Ismaning, Germany). To analyse *tOn-small* RGC responses to moving bars (protocol b), we defined the  
612 stimulus direction that generated most spikes (calculating the vector sum of the total spiking responses  
613 in 8 directions) as “preferred direction”, and calculated a direction selective index (*DSi*) as follows:

$$614 \quad DSi = \frac{R_P - R_N}{R_P + R_N}$$

615 with preferred direction-response  $R_P$  and null (=opposite) direction response  $R_N$ .

616 For the white noise stimulus (protocol e), we used the linear-nonlinear (LN) cascade model described  
617 earlier (Baccus and Meister, 2002; Chichilnisky, 2001; Field et al., 2010; Kim and Rieke, 2001; Wang et  
618 al., 2011) to interpret RGC responses. This model consists of a linear filter that determines the cell’s  
619 temporal, chromatic and spatial sensitivities, as well as a “static” nonlinearity that converts the filtered  
620 stimulus into a firing rate. In the time domain, the linear filter is proportional to the spike-triggered

621 average stimulus (STA, the average stimulus preceding each spike) (Chichilnisky, 2001). Therefore, for  
 622 LN models with identical linear filter but different nonlinearities, spike-triggered average stimuli are  
 623 identical up to a scale factor. We estimated the “static” nonlinearity from the nonlinear relationship  
 624 between linear filtered responses (“generator signal”) and real responses.

625 Due to the limited refresh rate of white noise stimulus (80 Hz), we defined number of spikes in a time  
 626 bin of  $\Delta t = 12.5$  ms (1/80 Hz) as the cell’s response, and STA was computed as the cross-correlation  
 627 between response and stimulus. For graded signal, the cell’s response was defined as relative average  
 628 voltage within each time bin (by subtracting the minimum voltage of the recorded trace).

629 We used the Difference-of-Gaussians (DOG) receptive field model in two dimensions to describe the  
 630 spatial structure of the recorded RGCs. We assumed that the receptive field (RF) of each cell could be  
 631 approximated by the weighted difference of two concentric Gaussian, one for the RF centre and one  
 632 for the RF surround. A nonlinear function was included into the model to convert this weighted sum  
 633 into the firing rate (Yin et al., 2009). An RGC’s response  $R$  to a spot stimulus centred in the RF and with  
 634 diameter  $D$  and contrast  $c$  was calculated as follows:

$$635 \quad R = f \left( \iint_{x^2+y^2 \leq D^2/4} \left( A_C \frac{1}{2\pi\sigma_C^2} e^{-\frac{x^2+y^2}{2\sigma_C^2}} - A_S \frac{1}{2\pi\sigma_S^2} e^{-\frac{x^2+y^2}{2\sigma_S^2}} \right) c \, dx dy \right)$$

636 with the nonlinear function  $f$ , amplitude ( $A_C$ ) and spatial extent ( $\sigma_C$ ) of the RF centre, as well as  
 637 amplitude ( $A_S$ ) and spatial extent ( $\sigma_S$ ) of the RF surround.

638 The nonlinear function  $f$  was determined using the same RGC’s responses to spots with fixed diameter  
 639 but varying contrasts, fitted by the Naka-Rushton Equation (Naka and Rushton, 1966):

$$640 \quad R(\text{contrast}) = R_{max} \frac{c^n}{c^n + c_{1/2}^n}$$

641 The other four parameters ( $A_C$ ,  $A_S$ ,  $\sigma_C$ ,  $\sigma_S$ ) were determined by fitting the model to area summation  
 642 data using a numerical search.

### 643 *Computational modelling*

644 To explain our experimental data, we constructed an one-compartment Hodgkin-Huxley model,

$$645 \quad c_m \frac{dV}{dt} = -\bar{g}_{Na} \cdot m^3 \cdot h \cdot (V - E_{Na}) - \bar{g}_K \cdot n^4 \cdot (V - E_K) - \bar{g}_L \cdot (V - E_L) + \frac{I_e + I_n}{A}$$

646 with the specific membrane capacitance  $c_m = 10$  nF/mm<sup>2</sup>, the voltage across the cell membrane ( $V$ ) in  
 647 mV, the maximal conductance for transient Na<sup>+</sup> current ( $\bar{g}_{Na}$ ), delayed-rectifier K<sup>+</sup> current and a  
 648 leakage current ( $\bar{g}_{Na} = 1.2$  mS/mm<sup>2</sup>;  $\bar{g}_K = 0.05$  mS/mm<sup>2</sup>;  $\bar{g}_L = 0.003$  mS/mm<sup>2</sup>), the reversal potentials  
 649 for the three currents ( $E_{Na} = 50$  mV;  $E_K = -76$  mV;  $E_L = -70$  mV), the area of the cell membrane ( $A =$

650 0.0013 mm<sup>2</sup>), the injected current ( $I_e$ ), and a noise component ( $I_n$ ) with a  $1/f$  power spectrum (pink  
651 noise). In Fig. 4C,  $I_e$  is the estimated response to a sequence of binary white noise, using the linear  
652 filter and static nonlinearity determined from graded voltage responses (Fig. 4A); in Fig. 4D,  $I_e$  are  
653 current steps with varying amplitudes. As gating functions for  $m$ ,  $h$ , and  $n$  we used:

$$654 \quad \alpha_m = 0.1 \frac{V+40}{1-e^{-0.1(V+40)}}, \quad \beta_m = 4e^{-0.0556(V+65)}$$

$$655 \quad \alpha_h = 0.07e^{-0.05(V+65)}, \quad \beta_h = \frac{1}{1-e^{3-0.1(V+65)}}$$

$$656 \quad \alpha_n = 0.01 \frac{V+55}{1-e^{-0.1(V+55)}}, \quad \beta_n = 0.125e^{-0.0125(V+65)}$$

657 After each spike, the voltage dependence of the gating functions for  $m$  and  $h$  was increased by 1.55  
658 mV for the sensitising model (i.e. tON-small RGCs) and by 0.01 mV for the non-desensitising case (i.e.  
659 sON- $\alpha$  RGCs). The recovery from this shift in voltage dependence followed an exponential function  
660 with a time constant of 5 s.

661 References

- 662 Anderson, J.S., Lampl, I., Gillespie, D.C., and Ferster, D. (2000). The contribution of noise to contrast invariance  
663 of orientation tuning in cat visual cortex. *Science (New York, N.Y.)* 290, 1968–1972.  
664 <https://doi.org/10.1126/science.290.5498.1968>.
- 665 Asari, H., and Meister, M. (2012). Divergence of visual channels in the inner retina. *Nat. Neurosci.* 15, 1581–  
666 1589. <https://doi.org/10.1038/nn.3241>.
- 667 Awatramani, G.B., and Slaughter, M.M. (2000). Origin of transient and sustained responses in ganglion cells of  
668 the retina. *J. Neurosci.* 20, 7087–7095. <https://doi.org/10.1523/jneurosci.20-18-07087.2000>.
- 669 Baccus, S.A., and Meister, M. (2002). Fast and slow contrast adaptation in retinal circuitry. *Neuron* 36, 909–919.  
670 .
- 671 Baden, T., Berens, P., Bethge, M., and Euler, T. (2013). Spikes in mammalian bipolar cells support temporal  
672 layering of the inner retina. *Curr. Biol.* 23, 48–52. <https://doi.org/10.1016/j.cub.2012.11.006>.
- 673 Baden, T., Berens, P., Franke, K., Román Rosón, M., Bethge, M., and Euler, T. (2016). The functional diversity of  
674 retinal ganglion cells in the mouse. *Nature* 529, 345–350. <https://doi.org/10.1038/nature16468>.
- 675 Baden, T., Euler, T., and Berens, P. (2020). Understanding the retinal basis of vision across species. *Nat. Rev.*  
676 *Neurosci.* 21, 5–20. <https://doi.org/10.1038/s41583-019-0242-1>.
- 677 Bae, J.A., Mu, S., Kim, J.S., Turner, N.L., Tartavull, I., Kemnitz, N., Jordan, C.S., Norton, A.D., Silversmith, W.M.,  
678 Prentki, R., et al. (2018). Digital Museum of Retinal Ganglion Cells with Dense Anatomy and Physiology. *Cell*  
679 173, 1293–1306.e19. <https://doi.org/10.1016/j.cell.2018.04.040>.
- 680 Barlow, H.B., Hill, R.M., and Levick, W.R. (1964). Retinal ganglion cells responding selectively to direction and  
681 speed of image motion in the rabbit. *J. Physiol.* 173, 377–407. <https://doi.org/10.1113/jphysiol.1964.sp007463>.
- 682 Bleckert, A., Schwartz, G.W., Turner, M.H., Rieke, F., and Wong, R.O.L. (2014). Visual space is represented by  
683 nonmatching topographies of distinct mouse retinal ganglion cell types. *Curr. Biol.* 24, 310–315.  
684 <https://doi.org/10.1016/j.cub.2013.12.020>.
- 685 Borst, A., and Euler, T. (2011). Seeing things in motion: models, circuits, and mechanisms. *Neuron* 71, 974–994.  
686 <https://doi.org/10.1016/j.neuron.2011.08.031>.
- 687 Branco, T., and Häusser, M. (2010). The single dendritic branch as a fundamental functional unit in the nervous  
688 system. *Curr. Opin. Neurobiol.* 20, 494–502. <https://doi.org/10.1016/j.conb.2010.07.009>.
- 689 Carter, B.C., and Bean, B.P. (2011). Incomplete inactivation and rapid recovery of voltage-dependent sodium  
690 channels during high-frequency firing in cerebellar Purkinje neurons. *J. Neurophysiol.* 105, 860–871.  
691 <https://doi.org/10.1152/jn.01056.2010>.
- 692 Chander, D., and Chichilnisky, E.J. (2001). Adaptation to temporal contrast in primate and salamander retina.  
693 *The Journal of Neuroscience : The Official Journal of the Society for Neuroscience* 21, 9904–9916. .
- 694 Chang, L., Breuninger, T., and Euler, T. (2013). Chromatic coding from cone-type unselective circuits in the  
695 mouse retina. *Neuron* 77, 559–571. <https://doi.org/10.1016/j.neuron.2012.12.012>.
- 696 Chichilnisky, E.J. (2001). A simple white noise analysis of neuronal light responses. *Network (Bristol, England)*  
697 12, 199–213. .
- 698 Coombs, J., van der List, D., Wang, G.-Y., and Chalupa, L.M. (2006). Morphological properties of mouse retinal  
699 ganglion cells. *Neuroscience* 140, 123–136. <https://doi.org/10.1016/j.neuroscience.2006.02.079>.
- 700 Cui, Y., Wang, Y.V., Park, S.J.H., Demb, J.B., and Butts, D.A. (2016). Divisive suppression explains high-precision  
701 firing and contrast adaptation in retinal ganglion cells (bioRxiv).
- 702 Cummins, T.R., and Waxman, S.G. (1997). Downregulation of tetrodotoxin-resistant sodium currents and  
703 upregulation of a rapidly repriming tetrodotoxin-sensitive sodium current in small spinal sensory neurons after  
704 nerve injury. *The Journal of Neuroscience : The Official Journal of the Society for Neuroscience* 17, 3503–3514. .
- 705 DeVries, S.H. (2000). Bipolar cells use kainate and AMPA receptors to filter visual information into separate  
706 channels. *Neuron* 28, 847–856. [https://doi.org/10.1016/s0896-6273\(00\)00158-6](https://doi.org/10.1016/s0896-6273(00)00158-6).

- 707 Diamond, J.S. (2017). Inhibitory Interneurons in the Retina: Types, Circuitry, and Function. *Annu Rev Vis Sci* 3,  
708 1–24. <https://doi.org/10.1146/annurev-vision-102016-061345>.
- 709 Drinnenberg, A., Franke, F., Morikawa, R.K., Jüttner, J., Hillier, D., Hantz, P., Hierlemann, A., Azeredo da Silveira,  
710 R., and Roska, B. (2018). How diverse retinal functions arise from feedback at the first visual synapse. *Neuron*  
711 99, 117–134.e11. <https://doi.org/10.1016/j.neuron.2018.06.001>.
- 712 Euler, T., Hausselt, S.E., Margolis, D.J., Breuninger, T., Castell, X., Detwiler, P.B., and Denk, W. (2009). Eyecup  
713 scope--optical recordings of light stimulus-evoked fluorescence signals in the retina. *Pflugers Arch.* 457, 1393–  
714 1414. <https://doi.org/10.1007/s00424-008-0603-5>.
- 715 Farrow, K., and Masland, R.H. (2011). Physiological clustering of visual channels in the mouse retina. *J.*  
716 *Neurophysiol.* 105, 1516–1530. <https://doi.org/10.1152/jn.00331.2010>.
- 717 Farrow, K., Teixeira, M., Szikra, T., Viney, T.J., Balint, K., Yonehara, K., and Roska, B. (2013). Ambient  
718 illumination toggles a neuronal circuit switch in the retina and visual perception at cone threshold. *Neuron* 78,  
719 325–338. <https://doi.org/10.1016/j.neuron.2013.02.014>.
- 720 Field, G.D., Gauthier, J.L., Sher, A., Greschner, M., Machado, T.A., Jepson, L.H., Shlens, J., Gunning, D.E.,  
721 Mathieson, K., Dabrowski, W., et al. (2010). Functional connectivity in the retina at the resolution of  
722 photoreceptors. *Nature* 467, 673–677. <https://doi.org/10.1038/nature09424>.
- 723 Fjell, J., Dib-Hajj, S., Fried, K., Black, J.A., and Waxman, S.G. (1997). Differential expression of sodium channel  
724 genes in retinal ganglion cells. *Brain Research. Molecular Brain Research* 50, 197–204. .
- 725 Franke, K., and Baden, T. (2017). General features of inhibition in the inner retina. *J. Physiol.* 595, 5507–5515.  
726 <https://doi.org/10.1113/JP273648>.
- 727 Franke, K., Berens, P., Schubert, T., Bethge, M., Euler, T., and Baden, T. (2017). Inhibition decorrelates visual  
728 feature representations in the inner retina. *Nature* 542, 439–444. <https://doi.org/10.1038/nature21394>.
- 729 Fried, S.I., Lasker, A.C.W., Desai, N.J., Eddington, D.K., and Rizzo, J.F. (2009). Axonal sodium-channel bands  
730 shape the response to electric stimulation in retinal ganglion cells. *Journal of Neurophysiology* 101, 1972–1987.  
731 <https://doi.org/10.1152/jn.91081.2008>.
- 732 Goetz, J., Jessen, Z.F., Jacobi, A., Mani, A., Cooler, S., Greer, D., Kadri, S., Segal, J., Shekhar, K., Sanes, J., et al.  
733 (2021). Unified classification of mouse retinal ganglion cells using function, morphology, and gene expression  
734 (bioRxiv).
- 735 Goldin, A.L. (1999). Diversity of mammalian voltage-gated sodium channels. *Annals of the New York Academy*  
736 *of Sciences* 868, 38–50. .
- 737 Gollisch, T., and Meister, M. (2010). Eye smarter than scientists believed: neural computations in circuits of the  
738 retina. *Neuron* 65, 150–164. [https://doi.org/S0896-6273\(09\)00999-4](https://doi.org/S0896-6273(09)00999-4) [pii]10.1016/j.neuron.2009.12.009.
- 739 Gong, S., Zheng, C., Doughty, M.L., Losos, K., Didkovsky, N., Schambra, U.B., Nowak, N.J., Joyner, A., Leblanc, G.,  
740 Hatten, M.E., et al. (2003). A gene expression atlas of the central nervous system based on bacterial artificial  
741 chromosomes. *Nature* 425, 917–925. <https://doi.org/10.1038/nature02033>.
- 742 Helmstaedter, M., Briggman, K.L., Turaga, S.C., Jain, V., Seung, H.S., and Denk, W. (2013). Connectomic  
743 reconstruction of the inner plexiform layer in the mouse retina. *Nature* 500, 168–174.  
744 <https://doi.org/10.1038/nature12346>.
- 745 Jacoby, J., Zhu, Y., DeVries, S.H., and Schwartz, G.W. (2015). An Amacrine Cell Circuit for Signaling Steady  
746 Illumination in the Retina. *Cell Rep.* 13, 2663–2670. <https://doi.org/10.1016/j.celrep.2015.11.062>.
- 747 Kanjhan, R., and Sivyer, B. (2010). Two types of ON direction-selective ganglion cells in rabbit retina. *Neurosci.*  
748 *Lett.* 483, 105–109. <https://doi.org/10.1016/j.neulet.2010.07.071>.
- 749 Kastner, D.B., and Baccus, S.A. (2011). Coordinated dynamic encoding in the retina using opposing forms of  
750 plasticity. *Nat Neurosci* 14, 1317–1322. <https://doi.org/nn.2906> [pii]10.1038/nn.2906.
- 751 Kerschensteiner, D. (2022). Feature detection by retinal ganglion cells. *Annu. Rev. Vis. Sci.* 8.  
752 <https://doi.org/10.1146/annurev-vision-100419-112009>.
- 753 Kim, K.J., and Rieke, F. (2001). Temporal contrast adaptation in the input and output signals of salamander  
754 retinal ganglion cells. *J. Neurosci.* 21, 287–299. .

- 755 Kim, K.J., and Rieke, F. (2003). Slow Na Inactivation and Variance Adaptation in Salamander Retinal Ganglion  
756 Cells. *The Journal of Neuroscience* 23, 1506–1516. <https://doi.org/10.1523/jneurosci.23-04-01506.2003>.
- 757 Kong, J.-H., Fish, D.R., Rockhill, R.L., and Masland, R.H. (2005). Diversity of ganglion cells in the mouse retina:  
758 unsupervised morphological classification and its limits. *J. Comp. Neurol.* 489, 293–310.  
759 <https://doi.org/10.1002/cne.20631>.
- 760 Krieger, B., Qiao, M., Rousso, D.L., Sanes, J.R., and Meister, M. (2017). Four alpha ganglion cell types in mouse  
761 retina: Function, structure, and molecular signatures. *PLoS One* 12, e0180091.  
762 <https://doi.org/10.1371/journal.pone.0180091>.
- 763 Levick, W.R. (1967). Receptive fields and trigger features of ganglion cells in the visual streak of the rabbit's  
764 retina. *J. Physiol.* 188, 285–307. <https://doi.org/10.1113/jphysiol.1967.sp008140>.
- 765 Lin, B., and Masland, R.H. (2006). Populations of wide-field amacrine cells in the mouse retina. *J. Comp. Neurol.*  
766 499, 797–809. <https://doi.org/10.1002/cne.21126>.
- 767 Majumdar, S., Wässle, H., Jusuf, P.R., and Haverkamp, S. (2008). Mirror-symmetrical populations of wide-field  
768 amacrine cells of the macaque monkey retina. *J. Comp. Neurol.* 508, 13–27.  
769 <https://doi.org/10.1002/cne.21666>.
- 770 Mani, A., and Schwartz, G.W. (2017). Circuit mechanisms of a retinal ganglion cell with stimulus-dependent  
771 response latency and activation beyond its dendrites. *Curr. Biol.* 27, 471–482.  
772 <https://doi.org/10.1016/j.cub.2016.12.033>.
- 773 Martiusz, B.J., Tsintsadze, T., Chang, W., and Smith, S.M. (2021). Enhanced excitability of cortical neurons in  
774 low-divalent solutions is primarily mediated by altered voltage-dependence of voltage-gated sodium channels.  
775 *ELife* 10, 1–26. <https://doi.org/10.7554/eLife.67914>.
- 776 Mauss, A.S., Vlasits, A., Borst, A., and Feller, M. (2017). Visual Circuits for Direction Selectivity. *Annu. Rev.*  
777 *Neurosci.* 40, 211–230. <https://doi.org/10.1146/annurev-neuro-072116-031335>.
- 778 Mobbs, P., Everett, K., and Cook, A. (1992). Signal shaping by voltage-gated currents in retinal ganglion cells.  
779 *Brain Res.* 574, 217–223. [https://doi.org/10.1016/0006-8993\(92\)90819-u](https://doi.org/10.1016/0006-8993(92)90819-u).
- 780 Münch, T.A., da Silveira, R.A., Siegert, S., Viney, T.J., Awatramani, G.B., and Roska, B. (2009). Approach  
781 sensitivity in the retina processed by a multifunctional neural circuit. *Nat. Neurosci.* 12, 1308–1316.  
782 <https://doi.org/10.1038/nn.2389>.
- 783 Naka, K.I., and Rushton, W.A. (1966). S-potentials from luminosity units in the retina of fish (Cyprinidae). *The*  
784 *Journal of Physiology* 185, 587–599. .
- 785 Neumann, S., Hüser, L., Ondreka, K., Euler, N., and Haverkamp, S. (2016). Cell type-specific bipolar cell input to  
786 ganglion cells in the mouse retina. *Neuroscience* 316, 420–432.  
787 <https://doi.org/10.1016/j.neuroscience.2015.12.051>.
- 788 Nikolaev, A., Leung, K.-M., Odermatt, B., and Lagnado, L. (2013). Synaptic mechanisms of adaptation and  
789 sensitization in the retina. *Nat. Neurosci.* 16, 934–941. <https://doi.org/10.1038/nn.3408>.
- 790 Nirenberg, S., and Meister, M. (1997). The light response of retinal ganglion cells is truncated by a displaced  
791 amacrine circuit. *Neuron* 18, 637–650. [https://doi.org/10.1016/s0896-6273\(00\)80304-9](https://doi.org/10.1016/s0896-6273(00)80304-9).
- 792 O'Brien, B.J., Isayama, T., Richardson, R., and Berson, D.M. (2002). Intrinsic physiological properties of cat  
793 retinal ganglion cells. *The Journal of Physiology* 538, 787–802. <https://doi.org/10.1113/jphysiol.2001.013009>.
- 794 O'Brien, B.J., Caldwell, J.H., Ehring, G.R., Bumsted O'Brien, K.M., Luo, S., and Levinson, S.R. (2008).  
795 Tetrodotoxin-resistant voltage-gated sodium channels Na(v)1.8 and Na(v)1.9 are expressed in the retina. *J*  
796 *Comp Neurol* 508, 940–951. <https://doi.org/10.1002/cne.21701>.
- 797 Oesch, N.W., and Taylor, W.R. (2010). Tetrodotoxin-resistant sodium channels contribute to directional  
798 responses in starburst amacrine cells. *PLoS ONE* 5, e12447. <https://doi.org/10.1371/journal.pone.0012447>.
- 799 Oesch, N., Euler, T., and Taylor, W.R. (2005). Direction-selective dendritic action potentials in rabbit retina.  
800 *Neuron* 47, 739–750. <https://doi.org/10.1016/j.neuron.2005.06.036>.
- 801 Pang, J.-J., Gao, F., and Wu, S.M. (2003). Light-evoked excitatory and inhibitory synaptic inputs to ON and OFF  
802 alpha ganglion cells in the mouse retina. *J. Neurosci.* 23, 6063–6073. [https://doi.org/10.1523/jneurosci.23-14-](https://doi.org/10.1523/jneurosci.23-14-06063.2003)  
803 06063.2003.

- 804 Park, S.J.H., Pottackal, J., Bin Ke, J., Jun, N.Y., Rahmani, P., Kim, I.J., Singer, J.H., and Demb, J.B. (2018).  
805 Convergence and divergence of CRH amacrine cells in mouse retinal circuitry. *Journal of Neuroscience* *38*,  
806 3753–3766. <https://doi.org/10.1523/JNEUROSCI.2518-17.2018>.
- 807 Peichl, L., Ott, H., and Boycott, B.B. (1987). Alpha ganglion cells in mammalian retinae. *Proc. R. Soc. Lond. B*  
808 *Biol. Sci.* *231*, 169–197. <https://doi.org/10.1098/rspb.1987.0040>.
- 809 Poleg-Polsky, A., and Diamond, J.S. (2011). Imperfect space clamp permits electrotonic interactions between  
810 inhibitory and excitatory synaptic conductances, distorting voltage clamp recordings. *PLoS One* *6*, e19463.  
811 <https://doi.org/10.1371/journal.pone.0019463>.
- 812 Raghuram, V., Werginz, P., and Fried, S.I. (2019). Scaling of the AIS and Somatodendritic Compartments in  $\alpha$  S  
813 RGCs. *Front. Cell. Neurosci.* *13*, 436. <https://doi.org/10.3389/fncel.2019.00436>.
- 814 Ran, Y., Huang, Z., Baden, T., Schubert, T., Baayen, H., Berens, P., Franke, K., and Euler, T. (2020). Type-specific  
815 dendritic integration in mouse retinal ganglion cells. *Nature Communications* *11*.  
816 <https://doi.org/10.1038/s41467-020-15867-9>.
- 817 Renganathan, M., Cummins, T.R., Hormuzdiar, W.N., and Waxman, S.G. (2000). alpha-SNS produces the slow  
818 TTX-resistant sodium current in large cutaneous afferent DRG neurons. *Journal of Neurophysiology* *84*, 710–  
819 718. .
- 820 Rheume, B.A., Jereen, A., Bolisetty, M., Sajid, M.S., Yang, Y., Renna, K., Sun, L., Robson, P., and Trakhtenberg,  
821 E.F. (2018). Single cell transcriptome profiling of retinal ganglion cells identifies cellular subtypes. *Nat.*  
822 *Commun.* *9*, 2759. <https://doi.org/10.1038/s41467-018-05134-3>.
- 823 Roska, B., and Werblin, F. (2001). Vertical interactions across ten parallel, stacked representations in the  
824 mammalian retina. *Nature* *410*, 583–587. <https://doi.org/10.1038/35069068>.
- 825 Rousoo, D.L., Qiao, M., Kagan, R.D., Yamagata, M., Palmiter, R.D., and Sanes, J.R. (2016). Two Pairs of ON and  
826 OFF Retinal Ganglion Cells Are Defined by Intersectional Patterns of Transcription Factor Expression. *Cell Rep.*  
827 *15*, 1930–1944. <https://doi.org/10.1016/j.celrep.2016.04.069>.
- 828 Sawant, A., Ebbinghaus, B.N., Bleckert, A., Gamlin, C., Yu, W.Q., Berson, D., Rudolph, U., Sinha, R., and Hoon, M.  
829 (2021). Organization and emergence of a mixed GABA-glycine retinal circuit that provides inhibition to mouse  
830 ON-sustained alpha retinal ganglion cells. *Cell Reports* *34*, 108858.  
831 <https://doi.org/10.1016/j.celrep.2021.108858>.
- 832 Schachter, M.J., Oesch, N., Smith, R.G., and Taylor, W.R. (2010). Dendritic spikes amplify the synaptic signal to  
833 enhance detection of motion in a simulation of the direction-selective ganglion cell. *PLoS Comput. Biol.* *6*.  
834 <https://doi.org/10.1371/journal.pcbi.1000899>.
- 835 Schwartz, G.W., Okawa, H., Dunn, F.A., Morgan, J.L., Kerschensteiner, D., Wong, R.O., and Rieke, F. (2012). The  
836 spatial structure of a nonlinear receptive field. *Nat. Neurosci.* *15*, 1572–1580. <https://doi.org/10.1038/nn.3225>.
- 837 Siegert, S., Scherf, B.G., Del Punta, K., Didkovsky, N., Heintz, N., and Roska, B. (2009). Genetic address book for  
838 retinal cell types. *Nat. Neurosci.* *12*, 1197–1204. <https://doi.org/10.1038/nn.2370>.
- 839 Siegert, S., Cabuy, E., Scherf, B.G., Kohler, H., Panda, S., Le, Y.-Z., Fehling, H.J., Gaidatzis, D., Stadler, M.B., and  
840 Roska, B. (2012). Transcriptional code and disease map for adult retinal cell types. *Nat. Neurosci.* *15*, 487–495,  
841 S1-2. <https://doi.org/10.1038/nn.3032>.
- 842 Silva, J. (2014). Slow inactivation of Na(+) channels. *Handb. Exp. Pharmacol.* *221*, 33–49.  
843 [https://doi.org/10.1007/978-3-642-41588-3\\_3](https://doi.org/10.1007/978-3-642-41588-3_3).
- 844 Stuart, G.J., and Spruston, N. (2015). Dendritic integration: 60 years of progress. *Nat. Neurosci.* *18*, 1713–1721.  
845 <https://doi.org/10.1038/nn.4157>.
- 846 Sümbül, U., Song, S., McCulloch, K., Becker, M., Lin, B., Sanes, J.R., Masland, R.H., and Seung, H.S. (2014). A  
847 genetic and computational approach to structurally classify neuronal types. *Nat. Commun.* *5*, 3512.  
848 <https://doi.org/10.1038/ncomms4512>.
- 849 Sun, W., Li, N., and He, S. (2002). Large-scale morphological survey of mouse retinal ganglion cells. *J. Comp.*  
850 *Neurol.* *451*, 115–126. <https://doi.org/10.1002/cne.10323>.



- 851 Tien, N.-W., Kim, T., and Kerschensteiner, D. (2016). Target-Specific Glycinergic Transmission from VGLUT3-  
852 Expressing Amacrine Cells Shapes Suppressive Contrast Responses in the Retina. *Cell Rep.* *15*, 1369–1375.  
853 <https://doi.org/10.1016/j.celrep.2016.04.025>.
- 854 Tikidji-Hamburyan, A., Reinhard, K., Seitter, H., Hovhannisyan, A., Procyk, C.A., Allen, A.E., Schenk, M., Lucas,  
855 R.J., and Münch, T.A. (2014). Retinal output changes qualitatively with every change in ambient illuminance.  
856 *Nature Neuroscience* <https://doi.org/10.1038/nn.3891>.
- 857 Tran-Van-Minh, A., Cazé, R.D., Abrahamsson, T., Cathala, L., Gutkin, B.S., and DiGregorio, D.A. (2015).  
858 Contribution of sublinear and supralinear dendritic integration to neuronal computations. *Front. Cell. Neurosci.*  
859 *9*, 67. <https://doi.org/10.3389/fncel.2015.00067>.
- 860 Tsai, D., Morley, J.W., Suaning, G.J., and Lovell, N.H. (2011). Sodium channel inactivation reduces retinal  
861 ganglion cell responsiveness to repetitive prosthetic stimulation. 2011 5th International IEEE/EMBS Conference  
862 on Neural Engineering, NER 2011 550–553. <https://doi.org/10.1109/NER.2011.5910607>.
- 863 Turner, M.H., and Rieke, F. (2016). Synaptic Rectification Controls Nonlinear Spatial Integration of Natural  
864 Visual Inputs. *Neuron* *90*, 1257–1271. <https://doi.org/10.1016/j.neuron.2016.05.006>.
- 865 Van Hook, M.J., Nawy, S., and Thoreson, W.B. (2019). Voltage- and calcium-gated ion channels of neurons in  
866 the vertebrate retina. *Progress in Retinal and Eye Research* *72*, 100760.  
867 <https://doi.org/10.1016/j.preteyeres.2019.05.001>.
- 868 Van Wart, A., Trimmer, J.S., and Matthews, G. (2007). Polarized distribution of ion channels within  
869 microdomains of the axon initial segment. *The Journal of Comparative Neurology* *500*, 339–352.  
870 <https://doi.org/10.1002/cne.21173>.
- 871 Velte, T.J., and Masland, R.H. (1999). Action potentials in the dendrites of retinal ganglion cells. *J. Neurophysiol.*  
872 *81*, 1412–1417. <https://doi.org/10.1152/jn.1999.81.3.1412>.
- 873 Wang, Y.V., Weick, M., and Demb, J.B. (2011). Spectral and temporal sensitivity of cone-mediated responses in  
874 mouse retinal ganglion cells. *J Neurosci* *31*, 7670–7681. <https://doi.org/10.1523/JNEUROSCI.0629-11.2011>.
- 875 Wässle, H. (2004). Parallel processing in the mammalian retina. *Nat Rev Neurosci* *5*, 747–757. .
- 876 Weick, M., and Demb, J.B. (2011). Delayed-Rectifier K Channels Contribute to Contrast Adaptation in  
877 Mammalian Retinal Ganglion Cells. *Neuron* *71*, 166–179. <https://doi.org/10.1016/j.neuron.2011.04.033>.
- 878 Werginz, P., Raghuram, V., and Fried, S.I. (2020). Tailoring of the axon initial segment shapes the conversion of  
879 synaptic inputs into spiking output in OFF- $\alpha$  T retinal ganglion cells. *Sci. Adv.* *6*, eabb6642.  
880 <https://doi.org/10.1126/sciadv.abb6642>.
- 881 Wienbar, S., and Schwartz, G.W. (2022). Differences in spike generation instead of synaptic inputs determine  
882 the feature selectivity of two retinal cell types. *Neuron* *110*, 2110-2123.e4.  
883 <https://doi.org/10.1016/j.neuron.2022.04.012>.
- 884 van Wyk, M., Taylor, W.R., and Vaney, D.I. (2006). Local edge detectors: a substrate for fine spatial vision at low  
885 temporal frequencies in rabbit retina. *J. Neurosci.* *26*, 13250–13263. <https://doi.org/10.1523/JNEUROSCI.1991-06.2006>.
- 887 van Wyk, M., Wässle, H., and Taylor, W.R. (2009). Receptive field properties of ON- and OFF-ganglion cells in  
888 the mouse retina. *Vis. Neurosci.* *26*, 297–308. <https://doi.org/10.1017/S0952523809990137>.
- 889 Yao, X., Cafaro, J., McLaughlin, A.J., Postma, F.R., Paul, D.L., Awatramani, G., and Field, G.D. (2018). Gap  
890 junctions contribute to differential light adaptation across direction-selective retinal ganglion cells. *Neuron* *100*,  
891 216-228.e6. <https://doi.org/10.1016/j.neuron.2018.08.021>.
- 892 Yin, L., Smith, R.G., Sterling, P., and Brainard, D.H. (2009). Physiology and morphology of color-opponent  
893 ganglion cells in a retina expressing a dual gradient of S and M opsins. *J Neurosci* *29*, 2706–2724.  
894 <https://doi.org/10.1523/JNEUROSCI.5471-08.2009>.
- 895 Yu, W.-Q., El-Danaf, R.N., Okawa, H., Pacholec, J.M., Matti, U., Schwarz, K., Odermatt, B., Dunn, F.A., Lagnado,  
896 L., Schmitz, F., et al. (2018). Synaptic Convergence Patterns onto Retinal Ganglion Cells Are Preserved despite  
897 Topographic Variation in Pre- and Postsynaptic Territories. *Cell Rep.* *25*, 2017-2026.e3.  
898 <https://doi.org/10.1016/j.celrep.2018.10.089>.

899 Zhang, C., and McCall, M.A. (2012). Receptor targets of amacrine cells. *Visual Neuroscience* 29, 11–29.  
900 <https://doi.org/10.1017/S0952523812000028>.

901 Zhang, Y., Kim, I.-J., Sanes, J.R., and Meister, M. (2012). The most numerous ganglion cell type of the mouse  
902 retina is a selective feature detector. *Proc. Natl. Acad. Sci. U. S. A.* 109, E2391-8.  
903 <https://doi.org/10.1073/pnas.1211547109>.

904

905

906

907

908

909

910

911

912

913

914

915

916

917

918

919

920

921

922

923

924

925

926

927

928

929

930

931

932

933

934

935

936 EXTENDED DATA

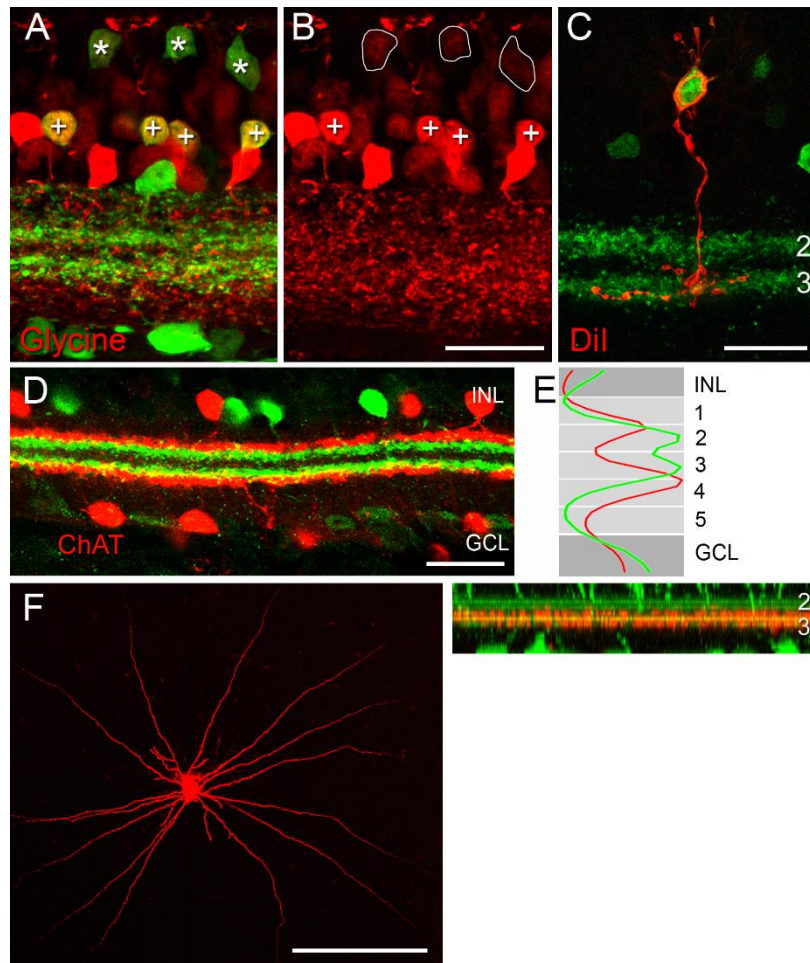

937

938

939 **Figure 1-1 | EGFP-labelled bipolar and amacrine cells in the *Igfbp5* transgenic mouse line (related to Fig. 1)**

940 **A,B** The INL contained many EGFP-labelled cells, including some GABA-positive ACs (data not shown) and many  
941 glycine-positive cells. The latter were comprised of ACs and On cone BCs. Vertical section of *Igfbp5* retina double-  
942 labelled for EGFP (green) and glycine (red). EGFP-labelled ACs in the second-inner row of the INL (+) and ON BCs  
943 (\*) contain glycine. EGFP-labelled processes extend along sublaminae 2 and 3 of the inner plexiform layer (IPL).  
944 **C**, Dil-injections (n=12 cells) revealed that the EGFP-labelled BCs morphologically corresponded to On cone BC  
945 type 5. Example of an individual Dil-injected EGFP-expressing BC with typical type 5 morphology, with axon  
946 terminals stratifying in sublamina 3. **D**, Vertical section double-labelled for EGFP (green) and ChAT (red). **E**,  
947 Fluorescence intensity profile along z-axis of a confocal stack of whole mount retina double-labelled for EGFP  
948 (green) and ChAT (red). **F**, Analogous dye injections showed that the EGFP ACs included various monostratified,  
949 medium- and wide-field cells with On or Off stratification (data not shown). Example of *Igfbp5*-positive amacrine

950 cell, following Dil filling in a retinal wholemount (left) with dendrites (red) stratifying in sublamina 3 (right). Scale  
951 bars: B-D, 20  $\mu\text{m}$ ; F, 200  $\mu\text{m}$ .

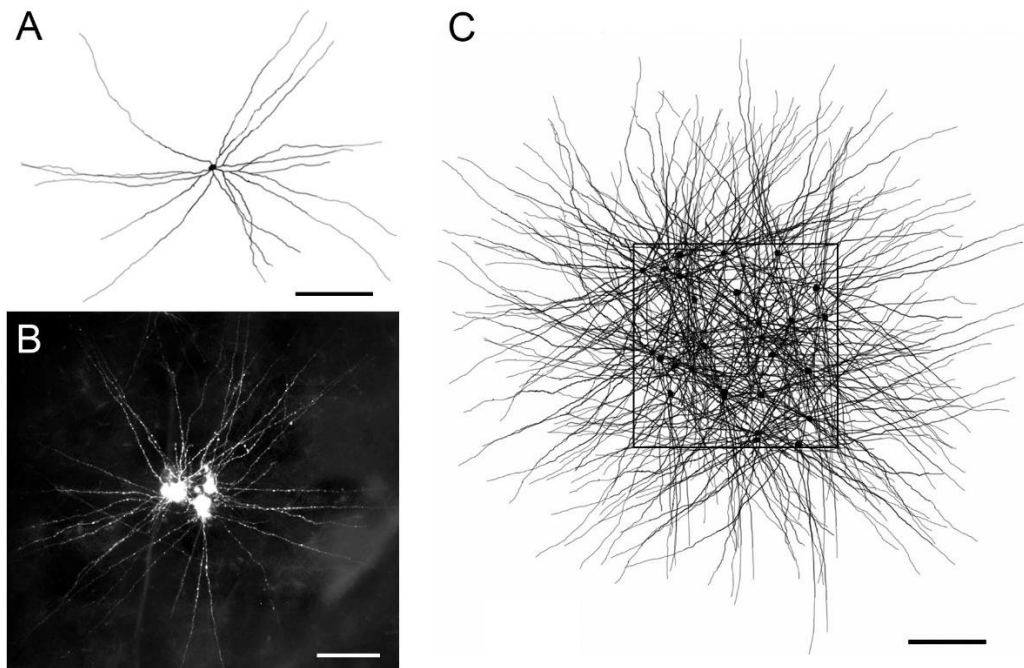

952

953

954 **Figure 1-2 | The mosaic of *Igfbp5*-positive On amacrine cells** (related to Fig. 1)

955 **A**, Reconstruction of a single, representative *Igfbp5*-positive amacrine cell, following Dil filling in a retinal  
956 wholemount. **B**, Mosaic of 5 neighbouring *Igfbp5*-positive amacrine cells filled with Dil. **C**, Illustration of the  
957 *Igfbp5* plexus serving the retinal patch delimited by the square. The patch contained 27 *Igfbp5*-positive amacrine  
958 cells (black square), to which 5 different representative morphological reconstructions were assigned randomly.  
959 Note that although very dense, the plexus is not complete, as dendrites from cell bodies located outside the  
960 depicted patch would cross this retinal area. Scale bars: A-C, 200  $\mu\text{m}$

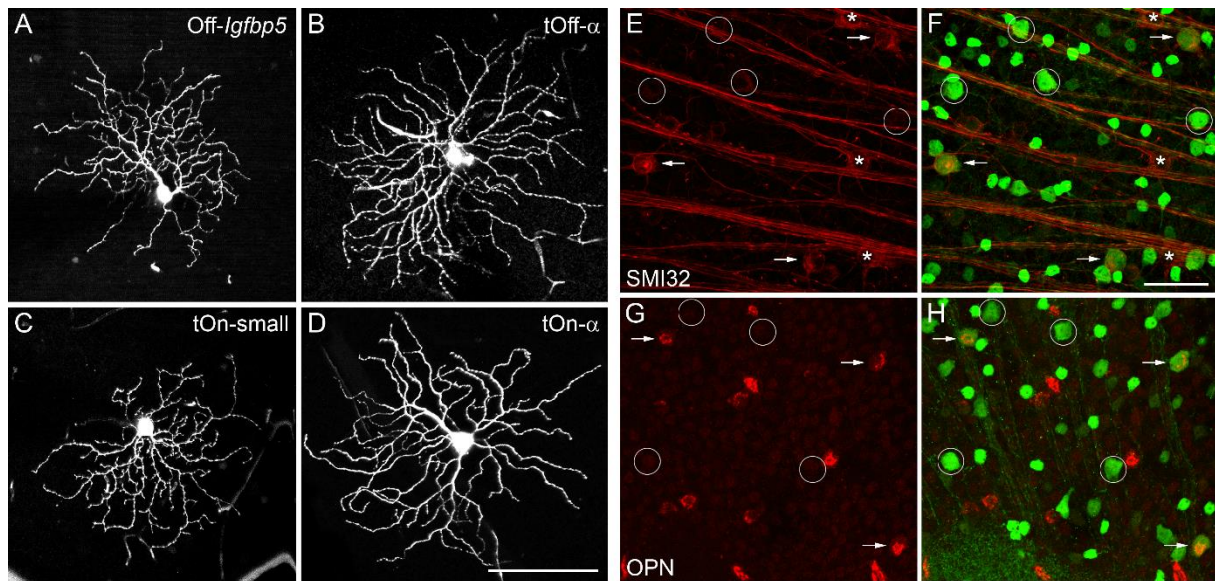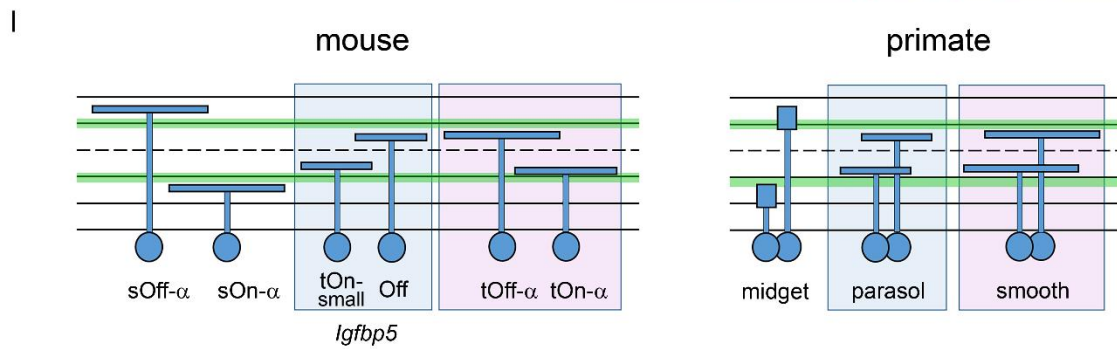

961

962

963 **Figure 2-1 | Retinal ganglion cells in the *Igfbp5* retina (related to Fig. 2)**

964 **A-C**, Examples of EGFP-positive RGCs: Off RGC (A), transient Off-alpha (tOff- $\alpha$ ) RGC (B), and transient On small  
 965 (tOn-small) RGC (C). **D**, For comparison, example of a (*Igfbp5*-negative) sustained On alpha (sOn- $\alpha$ ) RGC. The cells  
 966 were all collected (and filled with Neurobiotin) from the ventral retina (~0.8 mm from the optic disc). **E-H**, On  
 967 *Igfbp5*-positive RGCs are not immunoreactive for SMI32 and OPN. *Igfbp5* retina double-labelled with anti-  
 968 neurofilament marker SMI32 (red) [1–3] and anti-GFP (green; E,F). sOn- $\alpha$  (asterisks) and tOff- $\alpha$  RGCs (white  
 969 arrows) were SMI32-positive, whereas tOn-small RGCs (circles) were SMI32-negative. G,H, *Igfbp5* retina double  
 970 labelled with anti-osteopontin (OPN, red) and anti-GFP (green; G,H). tOff- $\alpha$  RGCs are OPN-positive (white  
 971 arrows), whereas tOn-small RGCs are OPN-negative (circles). **I**, Possible RGC homologues in mouse and primate  
 972 retina: Dendritic stratification depth of mouse RGCs within the IPL (left): sOff- $\alpha$  and sOn- $\alpha$  RGCs, Off and tOn-  
 973 small *Igfbp5*-positive RGCs, tOff- $\alpha$  and tOn- $\alpha$  RGCs. For comparison, dendritic stratification depth of primate  
 974 RGCs (right): Off and On midget RGCs, Off and On parasol RGCs, and Off and On smooth RGCs (adapted from [4]).  
 975 Scale bars: A-D, 100  $\mu$ m; E-H, 50  $\mu$ m.

976

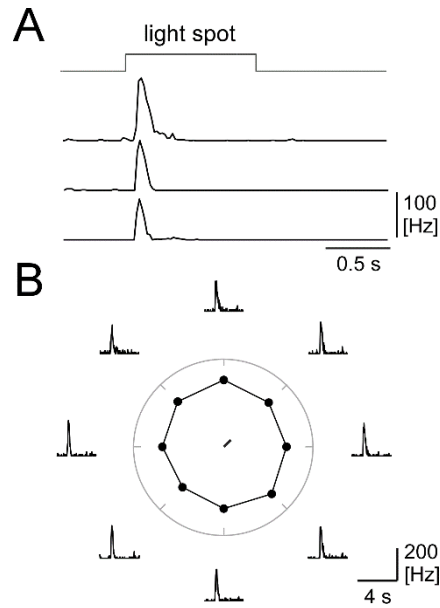

977

978

979 **Figure 3-1 | tOn-small ganglion cells are transient but not direction-selective** (related to Fig. 3).

980 **A**, Spike responses of three tOn-small RGCs to 1-s step light flash (diameter = 200  $\mu\text{m}$ ; average from 10 trials

981 each, 20-ms time bins). **B**, Spike responses of an exemplary tOn-small cell to bar stimuli moving in 8 directions;

982 responses shown as peri-stimulus time histogram (averages from 10 trials per direction, 20-ms time bins). Centre:

983 Polar plot showing directional tuning curve and vector sum (calculated from the mean spike rate during

984 stimulation for 8 directions) for an exemplary tOn-small RGC.

985 *References*

- 986 1. Lim, E.-J., Kim, I.-B., Oh, S.-J., and Chun, M.-H. (2007). Identification and characterization of SMI32-  
987 immunoreactive amacrine cells in the mouse retina. *Neurosci. Lett.* 424, 199–202.
- 988 2. Coombs, J., van der List, D., Wang, G.-Y., and Chalupa, L. M. (2006). Morphological properties of mouse  
989 retinal ganglion cells. *Neuroscience* 140, 123–36.
- 990 3. Bleckert, A., Schwartz, G. W., Turner, M. H., Rieke, F., and Wong, R. O. L. (2014). Visual space is  
991 represented by nonmatching topographies of distinct mouse retinal ganglion cell types. *Curr. Biol.* 24,  
992 310–5.
- 993 4. Crook, J. D., Peterson, B. B., Packer, O. S., Robinson, F. R., Gamlin, P. D., Troy, J. B., and Dacey, D. M.  
994 (2008). The smooth monostratified ganglion cell: evidence for spatial diversity in the Y-cell pathway to  
995 the lateral geniculate nucleus and superior colliculus in the macaque monkey. *J. Neurosci.* 28, 12654–  
996 12671.
- 997
- 998
